1 **Migration and establishment of progenitor pool of melanocytes is governed**  
2 **by SEMA3E-PLXND1 signaling**

3  
4  
5  
6  
7

Yogaspoorthi Subramaniam<sup>1,2</sup>, Babita Sharma<sup>1,2</sup>, Ayush Aggrawal<sup>1,2</sup>, Desingu Ayyappa Raja<sup>1,2</sup>, Iti  
Gupta<sup>1,2</sup>, Madeeha Ghazi<sup>1,2</sup>, Sridhar Sivasubbu<sup>1,2</sup> and Vivek T Natarajan<sup>1,2\*</sup>

8 <sup>1</sup> CSIR-Institute of Genomics and Integrative Biology, New Delhi, 110025, India  
9 <sup>2</sup> Academy of Scientific and Innovative Research, Ghaziabad, Uttar Pradesh, 201002, India

10  
11  
12  
13  
14  
15

16 \* Correspondence must be addressed to  
17 Vivek T Natarajan, Ph.D  
18 Email: [tnvivek@igib.in](mailto:tnvivek@igib.in), [tn.vivek@igib.res.in](mailto:tn.vivek@igib.res.in)

19  
20

21 **Classification:** Cell Biology, Developmental Biology, Signal transduction

22

23 **Running Title:** SEMA3E-PLXND1 mediated chemotaxis in melanocytes

24

25 **Key words:** Melanocyte, cell migration, guidance cues, chemotaxis, pigment patterning, signal  
26 crosstalk

27

1 **Abstract**

2 Vertebrate pigmentation is an outcome of an interplay of several signaling pathways that result  
3 in immense diversity of pigment patterns observed across the animal kingdom. Transitory  
4 nature of these signaling events impedes deciphering pathways that control migration and  
5 establishment of melanocyte stem cells (McSC), necessary for pigment patterning. Using  
6 zebrafish and cultured mammalian melanocytes, we uncover a hitherto unknown role for Plexin  
7 D1 signaling. This pathway directs migration by F-actin modulation and further dictates  
8 subsequent functional states of melanocytes through a transcriptional response. In zebrafish,  
9 abrogation of PLXND1 derails melanocyte migration and reduces mid-line melanophores  
10 emerging from the regeneration competent McSC pool. In cultured melanocytes, activation of  
11 PLXND1 by the ligand semaphorin 3E reduces the velocity of migration, influences directional  
12 correlation, and promotes movement towards positive cues such as SCF. PLXND1 activation  
13 results in EGFR signaling necessary for McSC establishment, and induces GNAS, an effector  
14 of MC1R pathway involved in melanocyte maturation. Identification of this long-range  
15 secreted negative chemotactic signaling provides a missing player and enriches reaction  
16 diffusion model for pigment patterning.

17

18

19

20

21

22

23

24

25

## 1 **Introduction**

2 Migration of neural crest cells (NCC) is accompanied with concomitant specification and  
3 differentiation leading to generation of melanocytes among other cell types [1]. It is likely that  
4 the spatial organization of the chemotactic microenvironment influences the migratory path  
5 and timely acquisition of the final differentiated state. Thereby, understanding the permissive  
6 and restrictive embryonic landscapes that regulate NCC streaming gains importance [2].  
7 Several signaling pathways including SCF, WNT3A, BMP4, ET1 *etc* are known to control the  
8 formation of melanocytes, and also influence their migration [3-9]. Among these the central  
9 role played by the cKit-Kitlg signaling (SCF or stem cell factor in mammals), in melanocyte  
10 migration is well established [4, 10].

11 The organized streaming of melanocyte precursors establishes Melanocyte stem cell  
12 (McSC) pool in defined areas such as hair follicle bulge region in mammals and near the dorsal  
13 root ganglion in zebrafish. The establishment of McSC is dependent on ERBB (an EGFR  
14 family receptor) and KIT signaling. Both genetic as well as pharmacological inhibition of  
15 ERBB signaling abrogates McSC establishment [11]. These McSCs are important for late-stage  
16 zebrafish larval melanocytes present in the lateral mid-line, as well as regeneration of  
17 pigmentation during injury and metamorphosis [11]. However, the mechanistic details of the  
18 stem cell pool establishment as well as its recall during regeneration remains elusive.

19 During migration, the transiting path of NCCs is restricted to well-defined routes by  
20 inhibitory signals [12]. Most prominent among the repulsive interactions is the contact  
21 inhibition of locomotion between migrating neural crest cells [13]. Additionally, several classes  
22 of Semaphorins and their cognate receptor Plexins are known to guide migratory cells by  
23 providing environmental cues. Detailed understanding of cellular pathfinding comes from the  
24 study of neuronal synaptic assemblies. Herein vertebrate-specific Semaphorins of the class 3  
25 restrict migration of neuronal growth cones by activating both Plexins and Neuropilins

1 (Nrps/Npns) [14, 15]. Similarly, SEMA6-PLXND1 axis is involved in navigating the cardiac  
2 NCCs during early vertebrate cardiac development [16]. SEMA3E-PLXND1 axis coordinates  
3 axonal extension and steering, in the developing nervous system [17]. Previously, this signaling  
4 is known to play a crucial role in branching and pathfinding morphogenesis of blood vessels  
5 during cardiovascular development (reviewed in [18] ). Secreted inhibitory cues have been  
6 known, but so far, they have not been elucidated for melanocyte migration.

7         In this study, we analysed the responsiveness of melanocyte precursors as they migrate  
8 across defined embryonic landscapes by studying the transcriptional regulation of cell surface  
9 receptors for guidance cues at different stages of melanocyte development. Plexin-D1 -  
10 semaphorin-3E signaling emerged as a pathway that controls melanocyte migration by the focal  
11 alterations of actin-cytoskeleton. Further this pathway cross-talks with EGFR signaling and  
12 modulates the establishment of melanocyte stem cell pool in zebrafish. Transcriptional  
13 activation brought about by this pathway preconditions cells to melanocortin signaling by  
14 upregulating GNAS, that promotes melanocyte differentiation. By identifying a key regulator  
15 of melanocyte behaviour our study provides crucial insights into the pigment pattern formation.

## 1 **Results**

### 2 ***plxnd1* is essential for melanophore patterning during development in zebrafish**

3 Receptor expression on cell surface is indicative of the cell's functional state. As NCCs  
4 progressively differentiate into patterned melanocytes, the expression levels of receptors that  
5 regulate biochemical and morphological properties are likely to change. To understand the  
6 basis of melanocytes developmental fate we isolated GFP expressing melanocytes from the  
7 transgenic *Tg (mitfa:GFP)* line during consecutive stages of their differentiation and analysed  
8 the expression of surface receptors and associated biological processes (Fig 1A and  
9 Supplementary Fig S1A-C).

10 Like most NCCs, melanocyte precursors adhere to strict routing pattern within the  
11 designated dorso-ventral and medial streams [11]. In zebrafish both these streams originate  
12 almost simultaneously [19]. The component of directional persistence during such migration  
13 is critical. Consistent with this, most chemotactic receptors including robos, netrins, ephrins  
14 and plexins were found differentially regulated during this developmental window (Fig 1B and  
15 Supplementary Fig S1B). While, majority of guidance receptors were drastically  
16 downregulated during melanocyte pattern development, members of plexin family namely,  
17 *plxnc1* and *plxnd1* were found to be progressively increased in expression (Fig 1B). Based on  
18 studies from hair follicle profiling, plexin C1 is known to have a prominent role in melanocyte  
19 stem cell maintenance [20]. Other class of plexin receptors, *plxnb1a*, *plxnb1b* and *plxna4* were  
20 found to be significantly decreased in expression in pigmented melanophores. The role of these  
21 plexin receptors in melanocyte migration if any, isn't known so far.

22 To delineate the role of plexin receptors in melanocytes we performed a quick screen  
23 using anti-sense morpholino based gene silencing strategy and analysed pigment patterning in  
24 developing zebrafish embryos. Morpholino-based silencing of *plxnd1* led to significant loss of  
25 pigmented melanophores at lateral mid-line with respect to the control embryos at 72 hours

1 post fertilisation (hpf) (Fig 1C & ID). Whereas, MO targeting other Plexins (*plxnb1a*, *plxnb1b*,  
2 *plxna4*) did not show this phenotype at the highest permissible concentration where viability  
3 was close to 85%. Even at very low doses, *plxnc1* morphants were lethal, hence its role if any  
4 in lateral mid-line formation could not be assessed (Supplementary Fig S1D&E). The *plxndl*  
5 morpholino used herein (*plxndl* MO1) targets splicing and has been reported earlier [21].  
6 Another sequence independent morpholino targeting the ATG site (*plxndl* MO2) resulted in a  
7 similar reduction in lateral mid-line melanophores (Supplementary Fig S1D). Using a custom  
8 synthesised antibody, we could demonstrate a reduction in the level of *plxndl* (Supplementary  
9 Fig S1F). CRISPR-based global ablation of *plxndl* in zebrafish using ribonucleoprotein  
10 complex also resulted in a similar phenotype (Supplementary Fig S1H&I). While the lack of  
11 involvement of *plxnb1a*, *plxnb1b* and *plxna4* on lateral mid-line melanophore establishment is  
12 difficult to comment solely on the basis of this morpholino screen, the phenotype of reduction  
13 in lateral mid-line melanophores appears to be selective to silencing of *plxndl*.

14 Previous studies demonstrate genetic ablation of *plxndl* in zebrafish leads to defects in  
15 vasculature and corresponding studies in mice suggest *plxndl* ablation to be prenatally lethal  
16 [22]. While the global CRISPR mutants were alive during the first few days, there was a marked  
17 lethality. Thereby, we adapted a cell-type specific knockout strategy using MinicoopR vector  
18 (addgene118844) created in Leonard Zon's lab. This plasmid drives Cas9 and *mitfa* mini gene  
19 under *mitfa* promotor (specific to melanocytes) and has a space for two sgRNA under  
20 ubiquitous promotor [23]. We replaced *mitfa* mini gene by GFP using restriction digestion  
21 approach to mark the melanophores (Fig 1H). Using this plasmid melanophore specific ablation  
22 was attempted using two different sequence independent sgRNA targeting *plxndl*, while the  
23 control involved a non-targeting sgRNA. This strategy also addresses the cell autonomic  
24 functions of *plxndl* and prevents phenotypes of *plxndl* in other cell types from confounding  
25 our interpretations. With this strategy we recapitulated the lateral melanophore reduction

1 phenotype (Fig 1F). Thereby using three independent approaches, namely two sequence  
2 independent morpholino based silencing, two sequence independent global knockout and two  
3 sequence independent melanocyte specific knockout, we demonstrate the selectivity of *plxnd1*  
4 in establishing the lateral mid-line melanophores.

5 Using transgenic melanocyte reporter line Tg(*fTyrp1*: GFP), we observed that early  
6 patterning of embryonic melanocytes at 48 hpf was substantially altered in *plxnd1* morphants  
7 (Fig 1D). The aberrant positioning of immature melanocytes at 48hpf could have led to  
8 defective embryonic pattern development at 3 days post fertilisation (dpf). Thereby we  
9 conclude that *plxnd1* is required for populating the lateral line melanophores. In our earlier  
10 study involving pigmentation melanocyte associated gene expression changes, we had observed  
11 *Plxnd1* to be regulated during the pigmentation program of cultured mouse B16 melanoma  
12 cells [24, 25], suggesting an important role of *plxnd1* in melanocyte during pigmentation.  
13 Though other plexins could have melanocyte specific functions, in this study we focus on  
14 investigating this signaling pathway further in detail.

15

### 16 **Loss of *plxnd1* leads to delay in melanocyte precursor streaming and aberrant embryonic** 17 **stripe pattern formation**

18 The *plxnd1* morphants show apparently normal distribution of melanocytes and only the lateral  
19 mid-line melanocytes are severely reduced. A likely possibility could be the improper  
20 migration of immature melanocyte precursors to home in the dorsal root ganglion and establish  
21 the McSC pool. We therefore performed time-lapse imaging of Tg (*mitfa*:GFP) labelled  
22 zebrafish morphants to track melanocyte migration. Streaming of these GFP-tagged cells  
23 proceeds in an orchestrated manner. Migrating melanocytes in zebrafish appear along both the  
24 neural crest streams: dorso-lateral and ventral, almost simultaneously and then segregate into  
25 lateral stripes (Fig 2A). In control morphants between 20-32 hpf active melanocyte migration

1 was clearly observed (Supplementary Video V1). Melanocytes were found both populating the  
2 dorsal stripe, migrating towards the posterior end, and arising into ventral streams. However,  
3 in *plxnd1* morphants the GFP-tagged cells were found to be restricted at the dorsal end. Both  
4 streams of migration were significantly inhibited (Supplementary Video V2). While  
5 melanocyte streams were clearly visible at dorsal trunk region at 20 hpf, their appearance  
6 towards the posterior regions leading to tail was defective in *plxnd1* morphants (Fig 2B). More  
7 strikingly *plxnd1* morphants had far fewer streams of ventrally migrating melanocytes (Fig 2C)  
8 that migrate to a shorter distance compared to the streams originating in control morphants (Fig  
9 2D).

10 Collective streaming of NCCs requires co-polarization events. In the absence of  
11 guidance cues, cells would migrate individually but lack the invasiveness to enable  
12 colonization of NC derivatives in target tissue. Even at 20 hpf such migration defects were  
13 clearly manifested in *plxnd1* morphant *Tg (sox10: GFP)* animals (Fig S2A), raising a  
14 possibility that *plxnd1* may play a role in migration and establishment of other neural crest  
15 derived lineages as well. To investigate this we silenced *plxnd1* in other transgenic lines and  
16 studied the integrity of Sox10 derived enteric ganglia *Tg (nbt:DsRed)* and jaw cartilage *Tg*  
17 *(sox10:GFP)* at 5dpf. While we could not trace individual migratory events for these two  
18 lineages, we observed that these sox10-progenitor derived neural crest lineages were  
19 structurally intact in *plxnd1* morphants (Fig S2 B-D). These results suggested that role of  
20 *plxnd1* in the positioning of NCC derived cells across the embryo may be selective to the  
21 melanocyte lineage.

22 Melanocyte precursors were earlier demonstrated to migrate along the projections of  
23 peripheral motor neurons [19]. Plexin-D1 acts as axonal guidance receptor in several neurons  
24 and can thereby affect neuronal projections [26]. Therefore, we analyzed the patterning of  
25 melanocyte streams along the peripheral neuronal projection. For this, we used double



1 transgenic zebrafish lines: *Tg (nbt:DsRed)* marking neuronal cells and *Tg (mitfa:GFP)* marking  
2 melanocytes, to discern the effects of *plxnd1* loss on the ability of melanocyte precursors to  
3 migrate along peripheral neurons of the dorsal root ganglia. Interestingly, despite there being  
4 prominent axonal projections arising from peripheral neurons towards the ventral portion of  
5 the embryo, upon silencing of *plxnd1* melanocyte precursors fail to form migrating streams  
6 (Fig 2E) indicating a possible cell autonomous role of *plxnd1* in melanocyte migration. Further  
7 delving into the functional effects of PLXND1 signaling in melanocyte migration we analyzed  
8 the cytoskeletal organization and migration properties of cultured mouse B16 melanocytes  
9 upon activation or inhibition of PLXND1 mediated signaling.

10

### 11 **PLXND1 receptor mediates SEMA3E induced F-actin collapse and modulates** 12 **directionality of migrating melanocytes**

13 To investigate the role of Plexin-D1 it was important to identify its cognate ligand in the context  
14 of melanocyte functions. Plexin-D1 can bind to multiple class 3 semaphorins as well as a class  
15 4 member - SEMA4A. In all these cases it can couple to cytoskeletal changes by activating  
16 small GTPases *via* the GTPase activating protein (GAP) domain of the receptor [27]. Several  
17 studies have demonstrated its role either as an attractant or repellent in a context dependent  
18 manner (ligand and co-receptor) [26]. We identified the cognate ligand of *plxnd1* based on anti-  
19 sense morpholino based silencing of known *plxnd1* ligands in zebrafish. The ligand function  
20 was scored based on phenotypic absence of melanocytes along the lateral line in zebrafish  
21 embryos. Since semaphorins *sema3c* and *sema4a* had no apparent effect on embryonic pigment  
22 pattern development, the interpretation was inconclusive. However, silencing of *sema3e*  
23 recapitulated the lateral line melanocyte patterning in the embryos and suggested this to be the  
24 possible ligand involved in *plxnd1* activation (Supplementary Fig S3A & B).

1           As we had initially observed alterations in the expression of *Plxnd1* in mouse B16  
2 melanoma derived cells, further experiments were carried out in these cells and later validated  
3 key observations in primary human melanocytes to delineate the cellular signaling effects.  
4 Treatment of B16 mouse melanoma-derived melanocytes with recombinant mouse SEMA3E  
5 resulted in immediate collapse in cell shape. This was clear upon staining the actin with  
6 phalloidin red to mark long filaments at the cell periphery as well as small actin foci (Fig 3A).  
7 SEMA3E treatment increased number of actin foci formation and concomitantly reduced the  
8 cell size (Fig 3B & C). Knockdown of Plexin-D1 (shPD) but not a non-targeting shRNA stable  
9 cells (shNT) inhibited SEMA3E induced collapse in cell shape by preventing the disassembly  
10 of filamentous actin (F-actin) (Supplementary Fig S3C-E). As plexins have  
11 structural/functional role in ECM attachment in cooperation with neuropilins, it was necessary  
12 to investigate whether F-actin disassembly is brought about by the PLXND1-SEMA3E  
13 signaling. Blockage of SEMA3E action by pre-treatment of cells with antibody against sema-  
14 binding domain of PLXND1 receptor (PD1 AB) but not normal rabbit IgG (IgG) prevented the  
15 cell collapse (Fig 3D top & bottom).

16           These morphological changes in cytoskeleton and cell shape are likely to have a direct  
17 consequence on cell motility. To understand the effect of SEMA3E-PLXND1 signaling on  
18 melanocyte migration we conducted a series of *in-vitro* chemotaxis assays. Time-lapse imaging  
19 (~16h) of B16 cells subjected to a stable gradient of SEMA3E demonstrated the guidance  
20 mechanism. Control B16 cells expressing non-targeting shRNA (shNT) demonstrated that cells  
21 migrated away from the SEMA3E gradient. Thereby this signaling demonstrated a chemo-  
22 repulsive behavior in melanocytes. Whereas cells stably expressing shRNA against PLXND1  
23 (shPD) failed to be repulsed by the addition of SEMA3E (+S3E) and migrated with reduced  
24 directional correlation (Fig 3E). Reduction in the protein level of PLXND1 could be captured  
25 by western blot analysis (Fig 3F).

1           Recent studies have demonstrated a combinatorial effect that various  
2 chemokine/chemotactic signals impose on migrating cells [28-30]. Studies on protective  
3 hyperpigmentation during the natural process of wound healing or epidermal tanning indicated  
4 that melanocytes proliferate and migrate towards cells secreting stem cell factor (SCF)[31].  
5 Basal skin keratinocytes of mice engineered to express SCF recruit melanocytes in the  
6 epidermis and consequently have epidermal pigmentation [32, 33]. The ortholog of SCF in  
7 zebrafish *kitlg* is known to promote melanocyte migration and establish the McSC stem cell  
8 pool to result in lateral line melanophore formation [34, 35]. Thereby, we monitored cell  
9 migration by subjecting the cells to a combination of SCF and SEMA3E gradients.

10           Melanocytes demonstrated chemokinetic behavior towards SCF when provided in  
11 isolation and an enhanced velocity of migrating melanocytes could be observed (Fig 3G). In  
12 combination with SCF, SEMA3E caused a significant decrease in melanocyte motility, when  
13 compared against the SCF gradient alone (Fig 3H and Supplementary Table 2). However, the  
14 results indicated that SEMA3E driven guidance added a significant component of directionality  
15 to cells migrating in response to SCF. Primary human epidermal melanocytes behaved  
16 similarly and showed a chemo-repulsive behavior with respect to SEMA3E (Supplementary  
17 Fig S3F). Polarized migration is responsible for collective migration of melanocyte precursors  
18 as observed during the melanoblast streaming in dorso-ventral pathway [36, 37]. Combined  
19 with the observations on melanocyte migration in zebrafish embryos, SEMA3E-PLXND1  
20 signaling pathway has the ability to guide melanocytes during embryonic pattern formation by  
21 channelizing melanocytes towards other known chemotactic cues such as SCF.

22

### 23 **SEMA3E-PLXND1 co-regulate melanocyte maturation program**

24 Melanocyte fate establishment is fluid until completion of migration and differentiation. Early  
25 melanocyte lineage marker (*mitfa*) appears around 18h of fertilization in zebrafish embryo at

1 dorsal end of neural tube in a rostro-caudal manner [38, 39]. By 24 hpf both lateral and medial  
2 streams are visibly migrating to populate the embryonic skin. Positional availability of  
3 chemotactic/chemokinetic cues in lateral and medial regions are likely to be independent and  
4 could lead to enforcement of distinct differentiation states. SEMA3E-PLXND1 signaling has  
5 an ability to activate intrinsic GAP activity and acutely remodel cellular cytoskeleton. While  
6 these effects are well-characterized, more recently the transactivating ability of PLXND1 on  
7 receptor tyrosine kinases has been delineated and complex interplay with other pathways is  
8 emerging [27, 40, 41]. The molecular responses of SEMA3E binding to PLXND1 receptor can  
9 lead to transcriptional regulation necessary for melanocyte survival and differentiation  
10 pathways.

11         Since the transcriptional responses could either be transient (like F-actin remodeling)  
12 or persistent, we treated B16 mouse melanocytes with recombinant mouse SEMA3E (5nM) for  
13 either 2h or 8h to capture both early and late responses. To distinctly identify transcriptional  
14 outcomes of signaling events from those elicited due to F-actin collapse, we compared them to  
15 signatures of Cytochalasin D (1 $\mu$ M for 8h) treatment. Early responses to SEMA3E treatment  
16 had several distinct transcriptional signatures associated with biological processes such as actin  
17 bundle assembly, cellular morphogenesis and GTPase signaling (Fig 4A). Interestingly *Gnas*,  
18 a gene that codes for G<sub>s</sub>- $\alpha$  component of heterotrimeric G protein associated with cAMP  
19 signaling was found significantly upregulated upon 2h treatment with SEMA3E but not at 8h  
20 of treatment (Fig 4B). This gene is associated with pigmented *cafe-au-lait* skin spots and is a  
21 well-known pigmentation gene [42]. Pigment synthesis in differentiated melanocytes is  
22 dependent on cAMP mediated signaling and is controlled by melanocyte stimulating hormone  
23  $\alpha$ -MSH by activating the MC1R receptor which couples with the adenylate cyclase using  
24 GNAS [43, 44]. We therefore hypothesized that SEMA3E treatment could couple activation  
25 by  $\alpha$ -MSH.

1 Treatment of SEMA3E is sufficient to elevate CREB phosphorylation and induction of  
2 tyrosinase perhaps due to the elevated basal activity of MC1R. Pretreatment of B16 cells with  
3 SEMA3E followed by MSH addition resulted in a further increase in CREB-phosphorylation  
4 (Ser133) and tyrosinase levels indicating synergism (Fig 4C). An induction in the *Mitf* mRNA  
5 levels could also be observed with SEMA3E treatment (Fig 4D). These results suggested a role  
6 of SEMA3E-PLXND1 signaling in amplifying the process of melanocyte maturation by pre-  
7 conditioning the cells for  $\alpha$ -MSH mediated activation of the differentiation program.

8 To map the transcriptional responses of SEMA3E to other pathways we performed  
9 connectivity map (CMAP) analysis using CLUE platform developed by Broad Institute, USA  
10 and compared the gene expression profile elicited by treatment of SEMA3E in melanocytes to  
11 other existing melanocyte datasets (Fig S4). One of the key pathways that emerged was the  
12 EGFR signaling pathway. Earlier study by [40] had demonstrated a physical association  
13 between PLXND1 receptor and ERBB2 and implicated a role in melanoma metastasis. Role of  
14 ERBB3B receptor that signals via the EGFR pathway in the establishment of melanocyte stem  
15 cell pool is well known [45]. Therefore, we analyzed the temporal effect of SEMA3E mediated  
16 stimulation on different EGFR phosphorylations (Fig 4 E-I): Y992 involved in PLC $\gamma$ -mediated  
17 downstream signaling, Y1045 involved in receptor ubiquitination and degradation) and Y1068  
18 associated with GRB2 mediated signaling. SEMA3E treatment showed a marginal increase in  
19 Y992 phosphorylation, with a peak around 60 min of treatment. Whereas changes in the  
20 phosphorylation at Y1045 and Y1068 were robust. Y1045 phosphorylation was activated  
21 within 5 min of SEMA3E stimulation and continued throughout the treatment duration. EGFR  
22 phosphorylation at Y1068 progressively increased and peaked between 30 min to 60 min of  
23 SEMA3E treatment before reverting to basal level. Changes in cell surface area as indicated  
24 by F-actin staining corresponded with changes in EGFR phosphorylation at Y992 – an initial  
25 collapse followed by gradual recovery of cell surface area (Fig 4E &F). The status of ERK1/2

1 phosphorylation remained below the basal levels (Fig 4H). AKT phosphorylation on the other  
2 hand remained constant. These observations suggested SEMA3E-PLXND1 signaling has an  
3 acute and significant effect on EGFR signaling events and could regulate melanocyte fate  
4 transitions during early development that are downstream of this signaling pathway.

5

### 6 **sema3e-plxnd1 signaling establishes melanocyte stem cells for pigment patterning**

7 Zebrafish mutants for *erbb3b* gene (*picasso*) develop normal pigment pattern during embryonic  
8 stages but have a significant loss in melanocytes that arise from stem cell pool during and after  
9 metamorphosis. We have so far demonstrated altered motility of melanocyte precursors and  
10 defective positioning of melanocyte stem cells. To explore the status of melanocyte stem cells  
11 that go on to populate adult animals, we treated *plxnd1* morphants at 24hpf with a melano-toxic  
12 chemical 4-(4-Morpholinobutylthio) phenol (MoTP) until 72hpf (Fig 5A). Once melanocytes  
13 were ablated these animals were transferred to fresh medium to allow melanocyte regeneration.  
14 At 72hpf when the morphants were transferred to fresh water post-MoTP treatment, the  
15 pigmented melanophores were completely ablated in both *plxnd1* morphants and control  
16 morphants [45]. Upon careful examination, positioning of cells with GFP expression in *Tg*  
17 *mitfa:GFP* cells could be clearly visible as MoTP resistant GFP positive cells in control  
18 animals, *plxnd1* morphants demonstrated absence of GFP positive MSCs in the lateral line (Fig  
19 5B). This could be due to a decreased mobility of melanocyte precursors during 24-48 hpf  
20 resulting in positioning of these precursors in alternate areas in the embryo. Since we did not  
21 observe extraneous melanophores, it is likely that these cells are programmed to cell death.  
22 Substantiating this possibility, the frequency of tunnel-TMR stained cells in *plxnd1* morphants  
23 at 36 hpf was found to be higher near the head and trunk region, indicating a greater amount of  
24 cell death (Fig 5C).

1           Upon completion of regeneration at 8dpf, control morphants animals regenerated  
2 melanocytes to around 80% or more, however *plxnd1* morphants had a lower regeneration  
3 potential of less than 60% (Fig 5E&F). While, it was difficult to estimate cell death specific to  
4 melanoblast, a clear decrease in *mitfa:GFP* tagged cells in MoTP treated *plxnd1* morphants at  
5 72hpf and lower pigmented regenerated melanocytes at 8dpf indicated towards a possible event  
6 of melanoblast death in *plxnd1* morphants.

7

## 8 **Discussion**

9 Self-assembly of characteristic patterns has been a matter of utmost fascination to biologists.  
10 To define and reconstruct pigment patterns, a comprehensive understanding of the involved  
11 players is necessary. Positive cues such as SCF that enable melanocyte migration are identified  
12 and well-characterized across several model systems, whereas the known negative cues so far  
13 happen to be contact dependent. Hence identification of a signaling pathway that restricts the  
14 migratory path and enables directionality, is an important milestone in our understanding of  
15 the behavior of neural crest derived cells. So far, such exquisite guidance mechanisms  
16 involving localized gradient of inhibitory cues have not been reported for melanocytes.

17           The path taken by melanocytes is distinct and well known. Knowledge of various  
18 positive cues and negative contact dependent signals explain the migratory path to a large  
19 extent. However, migration as distinct organized streams from specific dorsal locations  
20 remained perplexing. Based on our understanding of the role of plexin D1 and semaphorin 3E  
21 deciphered here, and earlier studies on the expression pattern of semaphorin 3E and *kitlg* (SCF)  
22 [34, 46, 47], we propose that melanocyte migration path is governed by the zone of expression  
23 of these two guidance factors (Fig 5G). SEMA3E-PLXND1 signaling pathway is critical for  
24 restricting melanocytes into orchestrated streams for targeting melanocytes to dermal regions  
25 towards SCF expression zones. It is likely that the integration of cues on melanocyte decides

1 the choice of migratory path and is observable as directional consolidation in chemotactic  
2 migrations observed *in vitro* against SCF and sema3e gradient contrasts.

3 Pathways that promote migration, such as SCF and endothelins have almost always  
4 been found to have a pro-melanocyte fate biasing effect as they impinge on the MITF gene-  
5 regulatory network. Hence, our understanding of these pathways in migration and fate  
6 determination have remained intertwined. Contact dependent restrictive cues primarily control  
7 migration and positioning of melanocyte, and their effect if any on melanocyte gene expression  
8 remain unexplored. Interestingly, the SEMA3E-PLXND1 guidance cue also impinges on the  
9 core pathways of melanocyte stem cell establishment and differentiation by co-opting other  
10 signaling pathways. While the transactivation of EGFR is likely due to direct interaction  
11 mediated activation, potentiation of the melanocortin pathway is indirect, *via* the expression of  
12 the MC1R effector GNAS. The latter effect is an outcome of cell shape change brought about  
13 by disruption of the F-actin filaments, as this is recapitulated upon cytochalasin D treatment.

14 Guidance mechanisms have a transient yet profound implications on cellular fate and  
15 functioning. This could be evident in the establishment of lateral line melanophore forming,  
16 regeneration competent stem cells. Previous reports have reported expression of PLXND1 in  
17 invasive melanoma tissues, suggesting a role in cancer metastasis [40]. Given the recapitulation  
18 of neural crest like characteristics in melanoma, it is likely that the invasive properties may  
19 arise from an expression pattern reminiscent of earlier developmental stages. This  
20 understanding of melanocyte responses to SEMA3E-PLXND1 guidance signaling would in  
21 future pave the path to predictably influence migration in cancerous conditions such as  
22 melanoma and in repopulating melanocytes in degenerative disorders such as vitiligo.

23



## 1 **Methods**

### 2 **Zebrafish maintenance**

3 The zebrafish lines used in this study: Assam wildtype - ASWT, *Tg(-4.9 sox10:egfp)ba2*,  
4 *Tg(mitfa:GFP)*, *Tg(ftyrp1:GFP)*, *Tg(Xla.Tubb:DsRED)* and double labelled  
5 *Tg(Fli:GFP/Gata:DsRed)* (details and references are provided in **Supplementary Table 1**).  
6 The zebrafish lines were bred, raised, and maintained as described in (Westerfield, 2000).  
7 Embryos were staged according to (Kimmel *et al.*, 1995). Embryos older than 24 hpf were  
8 treated with 0.003% PTU (1-phenyl-2- thiourea) to inhibit pigment formation whenever  
9 required, to aid in fluorescence imaging. Zebrafish handling and experiments were performed  
10 in accordance with the protocols that were approved by the Institutional Animal Ethics  
11 Committee (IAEC) of the CSIR-Institute of Genomics and Integrative Biology, India under the  
12 rules and regulations set by the Committee for the Purpose of Control and Supervision of  
13 Experiments on Animals (CPCSEA), Ministry of Environment, Forests and Climate Change,  
14 Government of India.

### 15 **Fluorescence activated cell sorting, RNA sample preparation and Microarray**

16 The microarray-based gene expression analysis was conducted in association with a senior  
17 colleague and the experimental details are in greater detail described in previously submitted  
18 thesis. Briefly, the fluorescently labelled cells were isolated by FACS from single cell  
19 suspensions made out of *Tg(mitfa:GFP)* embryos during different stages of melanocytes  
20 development - 18-22 hpf melanoblasts (bMEL in dorso-lateral streams), 28-32hpf immature  
21 melanocytes (iMEL) and 3dpf mature pigmented melanocytes (mMEL, mature). FACS was  
22 performed using BD Aria III. RNA was isolated from each of these sorted populations  
23 according to manufacturer's protocols (Nucleospin RNA XS kit; MachereyNagel). After  
24 ascertaining the quality by BioAnalyser and scoring for enrichment of melanocyte specific

1 genes by quantitative real-time PCR the samples were sent for gene expression analysis by  
2 microarrays at Genotypic technology, Bangalore, India. The analysis was performed using  
3 Genespring GX software. Microarray analysis was performed using Zebrafish\_GXP\_8X60K  
4 (AMADID: 74191) array slides using T7 promoter-based linear amplification to generate  
5 labelled complementary RNA. Manual image quality control for the slides was performed and  
6 found to be devoid of uneven hybridisation, streaks, blobs and other artefacts. Intra array  
7 quality check and percentile shift normalisation were performed using GeneSpring GX  
8 software. A (-0.6 to 0.6)  $\log_2$  fold change cut off was employed to ascertain differentially  
9 expressed genes in this dataset and p-value  $\leq 0.05$  to determine the consistency across  
10 biological replicates.

#### 11 **Percoll based density centrifugation of pigmented melanophores**

12 A modified protocol from Yamanaka H *et al* [48] was used to isolate pigmented melanophores  
13 from 3dpf zebrafish embryo. Briefly, the embryos were anesthetized and their heads were cut-  
14 off using scalpel to separate out pigmented retinal epithelial cells (RPE). Embryo bodies were  
15 then incubated in TrypLE solution (Gibco 12604013) with occasional pipetting to facilitate  
16 formation of cell suspension. The cell suspension was filtrated using a 22- $\mu\text{m}$  mesh and then  
17 gradient-centrifuged with 50% Percoll (Sigma) at  $30 \times g$  and  $28^\circ\text{C}$ . The pellet was resuspended  
18 in serum-free L15 (Gibco) medium. Cells were then washed with DPBS and immediately  
19 processed for RNA isolation according to manufacturer's protocols (Nucleospin RNA XS kit;  
20 MachereyNagel).

#### 21 **Anti-sense Morpholino based gene silencing**

22 All morpholinos (MOs) designed in this study were obtained from GeneTools. For preliminary  
23 screen for plexin receptors involved in melanocyte guidance one translational block morpholino  
24 each were against *plxnb1a*, *plxnb1b*, *plxnc1* and *plxnd1*. To validate the role of plexin d1

1 that emerged as significant receptor in melanocyte patterning from preliminary screen a  
2 previously reported splice-block morpholino against *plxnd1* (*plxnd1* SB-MO) was used. 3 other  
3 morpholinos individually targeting the cognate *plxnd1* ligands – *sema3g*, *sema3e* and *sema4d*  
4 were designed for identifying the ligand involved in *Plxnd1* mediated guidance response in  
5 zebrafish melanocytes during development. Standard control MO and p53 MO was obtained  
6 from GeneTools. Morpholinos were designed using gene tools website (<http://www.genetools.com/>).  
7

## 8 **Imaging**

9 Bright field imaging of live embryos was performed using Zeiss (Stemi 2000C) or Nikon  
10 smz800n. For initial phenotyping based on counting of pigmented melanocytes in brightfield,  
11 the embryos were treated with 0.003 % PTU beginning at 20 hpf until 3 dpf and then transferred  
12 to plain E3 water to initialize pigment synthesis. This allowed resolution between 2 adjacent  
13 melanophores that are otherwise difficult to count as separate cells. Zeiss axioscope A1  
14 microscope (with AxiocamHRc) was used for imaging of fluorescent embryos. Images were  
15 further processed and analyzed in Adobe Photoshop CS3 or Fiji. The embryos were either  
16 treated with tricaine or embedded in 1.5 – 2% of methylcellulose to restrict their movement  
17 during imaging.

## 18 **Time-lapse imaging of zebrafish embryos**

19 Live imaging of *Tg(mitfa:GFP)* embryos between 28 hpf-36 hpf were done using Leica SP8  
20 STED confocal microscope. Images were captured in xyzt mode at 10x magnification. 40 mm  
21 tissue culture dishes (Orange scientific) were used, on this the embryo was placed in a drop of  
22 E3 water and then overlaid with 2% Low melting agarose (LMA). The embryo was laid  
23 laterally to visualize dorso-lateral cell migration in trunk region. The plate was then filled with

1 E3 water, and the humidifier was used when the temperature was set at 32<sup>0</sup>C so as the  
2 temperature of the E3 water was maintained at 26-28° C. The images were sequentially  
3 captured first in green channel (488nm) and then in transmitted light. An interval of 30 minutes  
4 was maintained between each acquisition. Experiment was then exported as TIFF images and  
5 video files were created in the quicktime mode. The images at each minute interval were taken  
6 up for analysis using ImageJ (Fiji).

## 7 **Cell culture**

8 B16 mouse melanocytes (kind gift from the lab of Dr. Satyajit Rath at NII, New Delhi, India)  
9 were cultured in bicarbonate buffered DMEM-High Glucose (Sigma. D-5648), supplemented  
10 with 1x anti-anti (Gibco), 10% FBS (Gibco) at 37°c with 5% CO<sub>2</sub>.

11 NHEM neo-Normal human epidermal melanocytes (Lonza CC-250) were grown in  
12 proliferative conditions in PMA containing medium MBM4 (Lonza CC-3249). For  
13 differentiation, cells were switched to M254 medium for 3-4 population doublings  
14 (Thermofisher Scientific, Life Technologies).

## 15 **F-actin integrity assay**

16 Cells cultured to a confluence of 50,000 cells per cm<sup>2</sup> on coverslips were treated with 5nM  
17 purified recombinant mouse SEMA3E (R&D biosystems, catalog no. 3238-S3-025) for 15  
18 mins at 37°C. Immediately after the incubation the cells were washed with 1x DPBS, twice and  
19 then fixed with 4% paraformaldehyde at 37°C. Once fixed the cell were either stored in DPBS  
20 at 4°C or taken ahead for F-actin staining with Phalloidin (Alexa Fluor 568 Phalloidin- A22283,  
21 ThermoFisher scientific). Phalloidin stained coverslips were then imaged at high magnification  
22 with GE DeltaVision 100x oil immersion objective. Cell surface area was measured using Fiji  
23 analysis by marking the cell shape in brightfield and actin foci were calculated by the measure

1 particles function in Fiji after setting the colour threshold for the red channel. The particles were  
2 estimated based on set particle diameter of 0.1  $\mu\text{m}$  diameter and aspect ratio of 1.

### 3 **Chemotaxis assays**

4 Chemotaxis chamber assay was set-up in according to the protocol described by the  
5 manufacturer. Briefly, each chemotaxis coverslip has 3 (1mm wide) trough regions where the  
6 cells are seeded. Each trough is surrounded by media reservoirs on either side. The trough is  
7 connected to media reservoirs on either side by a small opening that allows for gradual  
8 diffusion of chemotactic agent across the trough, generating a concentration gradient. Once the  
9 cells are adhered and the chemotactic agent(s) are added into the respective reservoirs the  
10 chamber is set-up on the microscope stage for imaging. Growth promoting chemokine stem  
11 cell factor (SCF, PeproTech #300-07) was used for competition against SEMA3E. Time-lapse  
12 XYT imaging was done for ~20 hours with time interval of 30mins. During the imaging the  
13 slide was maintained at 37°C with 5% CO<sub>2</sub> using Environment controlling unit. Imaging was  
14 done with GE-DeltaVision at 10x magnification. Chemotaxis analysis was done by  
15 individually generating the tracks of each cell (>100 cell/per experiment) using manual  
16 tracking plugin in Fiji and then processing the track information in chemotaxis and migration  
17 tool (Fiji Plugin) developed by ibidi.

### 18 **SEMA3E neutralization assay**

19 The cells were pre-incubated with different concentrations of anti-N-ter-PLXND1 antibody  
20 (anti-NPD1 antibody) for 2 hours at 37°C. After this the cell were treated with recombinant  
21 SEMA3E and analysed for F-actin stability

### 22 **Microarray sample preparation from treated B16 cells**

1 B16 cells were cultured in 25cm<sup>2</sup> tissue culture flasks and treated with 5nM recombinant  
2 SEMA3E (R&D biosystems, catalog no. 3238-S3-025) for either 2 hours or 8 hours. To  
3 distinctly identify transcriptional signatures unique to loss of actin integrity, the cells were  
4 treated with 1µg/ml Cytochalasin D (1mg/ml stock solution in DMSO. C8273, Sigma-Aldrich)  
5 for 8 hours. RNA was isolated according to manufacturer's protocols (Nucleospin Triprep kit;  
6 MachereyNagel). Isolated RNAs were analyzed using BioAnalyzer and after satisfactory  
7 results microarray was performed on Agilent Mouse gene expression microarrays at Genotypic  
8 technology, Bangalore, India. All quality control measures were taken before executing the  
9 microarray. Mouse GXP\_8X60k AMADID: 065570 slides were used for microarray and  
10 Agilent Quick-Amp labelling kit (p/n5190-0442; T7 promoter- based linear amplification to  
11 generate labelled complementary RNA). All QC and further pipeline are similar as described  
12 in section 2 of methods. Data pertaining both the array experiments have been deposited in  
13 Gene Expression Omnibus.

#### 14 **Melanocyte regeneration model establishment**

15 *plxnd1* morphants and control morphants were dechorionated at 24 hpf and treated with 100  
16 µM MoTP till 72 hpf to ablate melanized melanophores. At 72 hpf, the embryos were rinsed  
17 twice with embryo water to remove residual MoTP. Treated embryos were grown in embryo  
18 water till 8 dpf and subsequently imaged to assess melanophore regeneration.

#### 19 **In-situ Tunnel-TMR staining**

20 Morphants between 32 hpf-48 hpf were dechorionated, anesthetized and fixed in ice-cold  
21 4%PFA for 2h at room temperature. Tissue was then permeabilized in a graded ethanol series  
22 (50%, 70%, 95% and 100%) followed by 10 min incubation in acetone at -20°C. permeabilized  
23 embryos were washed thrice with PBS and then treated with Proteinase K (10 µg/µl) for 30  
24 mins. After washing thrice with PBS the embryos were incubated in Tunnel-TMR labelling

1 mix (In Situ Cell Death Detection Kit, TMR red, Cat. No. 12 156 792 910) for 1h at 37°C in a  
2 humidified condition. Once labelled the embryos were washed and stored in PBS until imaged.

### 3 **Connectivity Map analysis**

4 A set of significantly up and down differentially regulated genes was used to query the  
5 connectivity map database (P-Value<0.05). Clue.io database was used to fetch the relevant  
6 drug treated expression profiles that were mimicking/reversing the SEMA3E treated gene  
7 expression signatures (<https://clue.io/>; dated ~10.04.2020). A cut-off of +/- 90 connectivity  
8 score and its treatment in A375 cell line was applied to filter the drugs. The complete gene  
9 expression profile for all of the filtered drugs was fetched and genes were classified as up/down  
10 regulated upon a respective drug treatment if it had a Z-score of +/- 0.5.

### 11 **CRISPR mutant generation**

12 Short guide RNA (sgRNA) targeting zebrafish *plxnd1* gene were selected from ECRISP 13  
13 (<http://www.e-crisp.org/E-CRISP/>) online tool using default parameters. Primers were  
14 designed for generating the complete sgRNAs (supplementary table 1) using annealing PCR.  
15 The products were gel eluted and purified using Qiaquick Gel extraction kit (Qiagen Cat no.  
16 1628704) according to manufacturer's protocols. In vitro transcription was performed on these  
17 PCR products using Megashortscript kit (ThermoScientific®;AM1354) according to  
18 manufacturer's protocol. These sgRNAs and Cas9 protein were (a kind gift from Dr. Souvik  
19 Maiti, CSIR-IGIB, India) incubated on 25°C to form complex and 100pg of sgRNA and 300pg  
20 of spCas9 protein was injected into single cell zebrafish embryos. The injected embryos were  
21 tested for IN/DEL using T7 endonuclease assay and confirmed by sequencing.

22 We adapted cell-type specific knockout strategy using MinicoopR vector in which *Mitfa*  
23 promoter (melanocyte specific promoter) drives Cas9 and *mitfa* mini gene and has space for  
24 two sgRNA under Ubiquitous (U6) promoter. We replaced *mitfa* mini gene with GFP using

1 restriction digestion approach. We injected mitfa :Cas9, mitfa :gfp plasmid a little ahead of one  
2 cell stage in zebrafish embryo and imaged it at 2dpf stage. Figure1H shows labelling of  
3 majority of melanophores.

4 We designed two sgRNA using CHOPCHOP (<https://chopchop.cbu.uib.no/>) targeting plxnd1  
5 gene. The cloning was performed by digesting the plasmid using BseRI enzyme. We confirmed  
6 the clones using PCR based approach using Forward primer specific to plasmid and sgRNA as  
7 a reverse primer. The validated clones were injected at one-cell stage in Zebrafish embryos and  
8 the imaging was done at 3dpf stage.

### 9 **Competing Interests**

10 Authors do not have any conflict of interest.

### 11 **Acknowledgements**

12 This work was supported by the Department of Science and Technology supported the work  
13 through the grant (GAP165). Council of Scientific and Industrial Research (CSIR), India,  
14 through grant RegenX-MLP2008 and Department of Biotechnology through the grant  
15 (GAP0182) provided support to the execution. YSJ acknowledges DBT for Research  
16 Fellowship. We thank Dr Rajesh S Gokhale for the meaningful discussions and constant  
17 support throughout the execution of this work.

18

### 19 **Data Submission**

20 Microarray Data pertaining to this work has been submitted to Gene Expression Omnibus  
21 repository **GSE189059** and **GSE189438**

22

### 23 **Supplementary Material**

24 Supplementary Table 1

25 Details of the reagents and their source information is provided



1  
2  
3  
4  
5  
6  
7  
8  
9  
10  
11  
12  
13  
14  
15  
16  
17  
18  
19  
20  
21  
22  
23  
24  
25  
26

Supplementary Table 2

Cell migration track information for B16 cells exposed sema3E, SCF and in combination.

Supplementary Video 1 and 2

Video files of melanocyte migration in developing control and plexin D1 morphant embryos

## Figure Legends

### Fig 1: *plxnd1* is required for lateral melanophore pattern establishment during early development

(A) Schematic representing experimental strategy for expression analysis of cell surface receptors during progressive stages of melanocyte development. (B) Expression heat map of differentially regulated cell surface receptors. Receptors with known functional roles in melanocyte development (magenta star). (C) Lateral embryonic melanophore patterning in plexin receptor morphants at 3dpf. Numbers represent embryos with <10 lateral melanophores out of total scored in one biological replicate out of three. Scale bar = 100 $\mu$ m. (D) Lateral embryonic melanophore patterning in *plxnd1* MO 1 and control MO in Tg(fTypr1: GFP) fishes that mark differentiating melanophores at 48 hpf. (E) Quantitation of lateral line melanophore in morphants (Fig 1C) at 3dpf. error bar: mean  $\pm$ s.e.m across 3 biological replicates. p-value<0.001 is depicted by \*\*\*. One way ANOVA Dunnett's multiple comparisons test. (F) f0 zebrafish embryos at 3 dpf injected either with plasmid driving *mitfa*:Cas9, *mitfa*:GFP or with *mitfa*:Cas9, *mitfa*:GFP, U6:*plxnd1* sgRNA1 and 2. Zoomed insets of lateral line melanophores is depicted at the bottom. (G) Quantitation of lateral line melanophores in mutants represented in (Fig 1F) at 3dpf. error bar: mean  $\pm$ s.d. p-value<0.0001 is depicted by \*\*\*\*. Scale bar = 100 $\mu$ m. One way ANOVA Dunnett's multiple comparisons test. (H) 2 dpf zebrafish embryos injected with *mitfa*:Cas9, *mitfa*:GFP plasmid.

### Fig 2: Loss of *plxnd1* leads to delay in melanoblast streaming

(A) Schematic of (left) migration route along dorso-lateral and dorso-ventral axis, (on right) migration route along medio-lateral route, cell types are labelled at the bottom. (B) Snapshots at 20hpf, 24hpf and 32hpf from time-lapse imaging of Tg *mitfa*:GFP morphants. *in-sets* depict the streams arising from dorsal end marked along the dotted white line. Scale - 200 $\mu$ m (C) Quantitation of number of streams in morphants. (D) quantitation of stream lengths originating

1 at dorsal end.10-12 streams were analysed from 3 animals per morpholino injection. error bar:  
2 mean  $\pm$ s.e.m . \*\*\*\* represents a p-value <0.005. (E) Melanocyte streams marked with  
3 *mitfa:GFP* migrating along neuronal projections marked with *Tg nbt:dsRed*. Scale - 50 $\mu$ m  
4

5 **Fig 3: PLXND1 receptor mediates SEMA3E triggered F-actin collapse and affects**  
6 **directionality of migrating melanocytes**

7 (A) Control B16 melanocytes or SEMA3E treated cells labelled with Phalloidin labelling F-  
8 actin, Scale bar=10  $\mu$ m (B) Quantitation of nucleated actin foci (calculated as particles with  
9 aspect ratio = 1 and radius < 5 $\mu$ m) in control media or SEMA3E treated cells. (C) Quantitation  
10 of cell surface area of B16 melanocytes upon treatment with SEMA3E. For B & C: n>100 from  
11 3 biological replicates represented as scatter plot. Two tailed t-test, p-value<0.001 is  
12 represented as\*\*\*. (D) Phalloidin labelled B16 cell pre-treated with PLXND1 neutralizing  
13 antibody (PD1 Ab) or normal rabbit IgG as control followed by treatment with 5nM SEMA3E  
14 (+S3E), Scale bar=15 $\mu$ m, bottom: Quantitation of cell surface area upon antibody based  
15 neutralization of SEMA3E treated B16 cells. N=25 cells, 2 biological replicates. bars:  
16 mean $\pm$ sem across 3 biological replicates. One way ANOVA Turkey's multiple comparison test  
17 \*\*\*indicate P-value<0.05. (E) Rose plots depicting spatial distribution of shRNA either shNT  
18 non-targetting control or Plexind1 shRNA (shPD) transfected cells in chemotaxis chamber  
19 assay with treatments as indicated. In the circular rose plot, blue dots represent the angle  
20 position with the maxima of counts marked in red depicting the dominant direction of the cell  
21 motion across the gradient. P value calculated by Rayleigh's statistic using Chemotaxis and  
22 migration analysis tool. (F) protein level of PLXND1 in shRNA expressing B16 cells shNT  
23 (non-targeting control) and shPD (plxnd1 targeting shRNA), numbers represent tubulin  
24 normalized fold change with respect to shNT. (G) Bean plot indicating the average track  
25 velocities across the experiment conditions. One way ANOVA, Turkey's multiple comparison  
26 test, p value = 0.2742 non-significant. Bartlett's statistic P value=0.154. (H) Rose plots  
27 depicting spatial distribution of B16 cells in chemotaxis chamber assay in presence of SCF or  
28 in a gradient generated between SCF on one side and SEMA3E on the opposite side. In the  
29 circular rose plot, blue dots represent the angle position with the maxima of counts marked in  
30 red depicting the dominant direction of the cell motion across the gradient. P value calculated  
31 for Rayleigh's statistic in Chemotaxis and migration analysis tool.  
32

33 **Fig 4: Gene expression changes and melanocyte functioning upon Sema3e treatment**

34 (A) Biological processes enriched upon SEMA3E treatment with an adjusted p value < 0.05  
35 (upregulated in red, downregulated in blue) size of the circle depicts the number of  
36 differentially regulated genes with a p value of < 0.05. (B) mRNA expression of GTPases  
37 binding proteins (with a p value of < 0.05) depicted as heatmap, that are enriched upon  
38 SEMA3E treatment. (C) Levels of pigmentation associated proteins expressed in B16 cells  
39 upon treatment with SEMA3E (n=2 replicates). Values represent  $\beta$  tubulin normalized fold  
40 change over no treatment control (NTC). (D) Quantitation of *Mitf* expression mRNA levels  
41 upon SEMA3E treatment across two biological replicates. (E) Changes in cell shape upon  
42 treatment with SEMA3E analyzed by estimating area marked by phalloidin staining of F-actin,

1 scale=20 $\mu$ m (F) Comparative trends of a cell shape changes and (G) protein phosphorylation  
2 states of EGFR, (H) AKT and ERK1/2. Values represent mean $\pm$ SEM across biological  
3 triplicates. (I) Representative western blot analysis of dynamic regulation of protein kinase  
4 phosphorylation states upon various durations of SEMA3E treatment.  
5

6 **Fig 5: *plxnd1* is essential for maintenance of melanocyte stem cell pool and regeneration**

7 (A) Experimental strategy for MoTP (4-(4-Morpholinobutylthio) phenol) based melanocyte  
8 ablation and subsequent regeneration in morphants. (B) Stitched images of the zebrafish  
9 embryos expressing *GFP* under *mitfa* promoter upon completion of MoTP based melanophore  
10 ablation at 3dpf. Scale 30 $\mu$ m. (C) Representative images of tunnel-TMR stained lateral trunk  
11 region in morphants indicating extent of apoptosis at 36 hpf. Scale 30 $\mu$ m. (D) lateral trunk  
12 region with regenerated melanophores at 8 dpf in MoTP treated animals. Scale 100 $\mu$ m. (E)  
13 Quantitation of mid-line melanophores in morphants at 8dpf (post- regeneration) in MoTP  
14 treated morphants. Turkey's Multiple Comparison Test, \*\* p value <0.05, \*\*\* p-value <0.005.  
15 (F) Melanophore regeneration represented as a percent of regeneration *wrt* corresponding  
16 control or *plxnd1* morphant, unablated embryos in MoTP treated. Unpaired T-test, p  
17 value<0.06. (G) Graphical presentation of the model for melanophore migration and mid-line  
18 melanophore establishment. Relative chemotactic gradients and melanophore positioning  
19 during melanocyte pattern development in zebrafish.  
20

21 **Supplementary Figure Legends**

22  
23 **Fig S1: Identification of *plxnd1* as cell surface receptor essential in melanocyte  
24 patterning.**

25 (A) Fold enrichment of *Mitf* expressing cells upon FACS sorting or density centrifugation. (B)  
26 Heatmap of log<sub>2</sub> (fold change) in genes involved in melanocyte differentiation during  
27 melanocyte development. Size of the circle is proportional to the number of genes representing  
28 that pathway and the corresponding adjusted p value scales are depicted. (C) (right) Heatmap  
29 of log<sub>2</sub> (fold change) in transcription factors involved in melanocyte specification during  
30 melanocyte development. (left) Heat-map of key cell adhesion and melanocyte differentiation  
31 genes upregulated during the McSc to pMel transition. (D) Lateral embryonic melanophore  
32 patterning in *plxnb1a*, *plxnb1b* and *plxnd1* (splice block) morphants at 5dpf, n=20. Scale-  
33 100 $\mu$ m. (E) Quantitation of mid-line melanophores in Morpholino against different *plxns*  
34 injected animals at 2dpf, n=25 each in 3 biological replicates. \*\*\* indicates a p-value < 0.001  
35 and bottom bar graph depicts quantified lateral mid-line melanophores. (F) Western blot  
36 analysis of control and *plxnd1* morphant embryo (*plxnd1* MO1) lysates probed with PLXND1  
37 antibody and normalized to  $\beta$ -Actin. (G) Vascular branching in control or *plxnd1* morphants at  
38 2dpf marked by *fli:GFP*, in-sets depicting branching defects at dorsal end. Scale bar=50 $\mu$ m.  
39 (H) F0 zebrafish embryos at 5 dpf injected either with Cas9 protein alone (top) or with Cas9  
40 protein along with *plxnd1* sgRNA targeting the *plxnd1* locus (bottom). Red arrowheads indicate  
41 lateral line melanophores. (I) Amplicon sequencing of F0 animals at the CRISPR locus in  
42 plexin D1.  
43

44 **Fig S2: Decrease in PLXND1 levels leads to delay in melanoblast streaming**

1 (A) Migrating Sox10:GFP positive cells between 18-22hpf in morphants. (B) Positioning and  
2 integrity of Sox10 derived enteric ganglia. (C) Quantitation of number of enteric speckles in  
3 morphants. Two tailed t-test, p value=0.49, indicating the difference to be non-significant.  
4 Error bars= mean±SEM across two biological replicates, n=20. (D) Integrity of sox 10 derived  
5 Jaw cartilage in morphants. me: mesenteric cartilage, cb1-5: cerato-brachial arches, Ch- Cerato  
6 Hyoid. Scale bar = 100µm.

7

8 **Fig S3: PLXND1 receptor mediates SEMA3E triggered F-actin collapse and affects**  
9 **directionality of migrating melanocytes**

10 (A) Embryonic melanocyte patterning at 5dpf in morphants of cognate semaphorins that are  
11 known to function with *plxnd1*, in-sets depict the lateral trunk region with pigmented  
12 melanocytes, scale bars=200µm. Red arrowheads point out mid-line lateral melanophores. (B)  
13 Quantitation of melanocytes at lateral mid-line in semaphorin morphants. Error bar=  
14 mean±sem; n=20 per morpholino, 2 biological replicates. \*\*\* depicts p-value<0.01, one-way  
15 ANOVA, Dunnett's multiple comparison test. (C) F-actin labelled with Phalloidin in shNT  
16 (non-targeting short hairpin) and shPD (short hairpin targeting *plxnd1*) expressing B16 cells  
17 treated with control media or SEMA3E, Scale bar=20 µm Average velocity of individual cell  
18 tracks during chemotaxis assay. Two tailed t-test, \* represents p-value <0.0018. bars=  
19 mean±s.e.m. (E) Quantitation of nucleated actin foci in control media or SEMA3E treated  
20 shRNA expressing cells. (F) Rose plots depicting the spread of migrating primary human  
21 melanocytes in chemotaxis chamber assay upon exposure to chemotactic gradients. P value  
22 calculated by Rayleigh's statistic in Chemotaxis and migration analysis. N>250 cell, 2  
23 replicates. (G) Quantitation of cell surface area foci of control media or SEMA3E treated  
24 shRNA expressing B16 cells.

25

26 **Fig S4: Connectivity map analysis of SEMA3E treated gene expression data**

27 (A) Heatmap depicting the expression status of genes upon indicated drug treatment. The  
28 green-red colour of the heatmap are the Z-score values from connectivity map analysis. Here,  
29 Rows represents the drugs and column represents the genes (downregulated genes  
30 upon *SEMA3E* treatment). The top multi-coloured annotation bar represents the class of a gene  
31 and the right-hand side annotation bar plot represents the percentage of the gene that is getting  
32 up/down regulated upon the respective drug treatment (yellow represents down and blue  
33 represents up).

## 1 REFERENCES

- 2
- 3
- 4 1. Mayor, R. and E. Theveneau, *The neural crest*. Development, 2013. **140**(11): p. 2247-51.
- 5
- 6 2. Theveneau, E. and R. Mayor, *Collective cell migration of the cephalic neural crest: the art of integrating information*. Genesis, 2011. **49**(4): p. 164-76.
- 7
- 8 3. Yoshida, H., et al., *Review: melanocyte migration and survival controlled by SCF/c-kit expression*. J Invest Dermatol Symp Proc, 2001. **6**(1): p. 1-5.
- 9
- 10 4. Longley, B.J. and E.L. Carter, *SCF-KIT pathway in human epidermal melanocyte homeostasis*. J Invest Dermatol, 1999. **113**(1): p. 139-40.
- 11
- 12 5. Lahav, R., et al., *Endothelin 3 promotes neural crest cell proliferation and mediates a vast increase in melanocyte number in culture*. Proc Natl Acad Sci U S A, 1996. **93**(9): p. 3892-7.
- 13
- 14
- 15 6. Pla, P., et al., *Ednrb2 orients cell migration towards the dorsolateral neural crest pathway and promotes melanocyte differentiation*. Pigment Cell Res, 2005. **18**(3): p. 181-7.
- 16
- 17
- 18 7. Jin, E.J., et al., *Wnt and BMP signaling govern lineage segregation of melanocytes in the avian embryo*. Dev Biol, 2001. **233**(1): p. 22-37.
- 19
- 20 8. Garcia-Borron, J.C., Z. Abdel-Malek, and C. Jimenez-Cervantes, *MC1R, the cAMP pathway, and the response to solar UV: extending the horizon beyond pigmentation*. Pigment Cell Melanoma Res, 2014. **27**(5): p. 699-720.
- 21
- 22
- 23 9. Rodriguez, C.I. and V. Setaluri, *Cyclic AMP (cAMP) signaling in melanocytes and melanoma*. Arch Biochem Biophys, 2014. **563**: p. 22-7.
- 24
- 25 10. Herraiz, C., et al., *Signaling from the human melanocortin 1 receptor to ERK1 and ERK2 mitogen-activated protein kinases involves transactivation of cKIT*. Mol Endocrinol, 2011. **25**(1): p. 138-56.
- 26
- 27
- 28 11. Mort, R.L., I.J. Jackson, and E.E. Patton, *The melanocyte lineage in development and disease*. Development, 2015. **142**(4): p. 620-32.
- 29
- 30 12. Theveneau, E. and R. Mayor, *Neural crest migration: interplay between chemorepellents, chemoattractants, contact inhibition, epithelial-mesenchymal transition, and collective cell migration*. Wiley Interdiscip Rev Dev Biol, 2012. **1**(3): p. 435-45.
- 31
- 32
- 33
- 34 13. Carmona-Fontaine, C., et al., *Contact inhibition of locomotion in vivo controls neural crest directional migration*. Nature, 2008. **456**(7224): p. 957-61.
- 35
- 36 14. Sanes, J.R. and S.L. Zipursky, *Synaptic Specificity, Recognition Molecules, and Assembly of Neural Circuits*. Cell, 2020. **181**(6): p. 1434-1435.
- 37
- 38 15. Chauvet, S., et al., *Gating of Sema3E/PlexinD1 signaling by neuropilin-1 switches axonal repulsion to attraction during brain development*. Neuron, 2007. **56**(5): p. 807-822.
- 39
- 40
- 41 16. Toyofuku, T., et al., *Repulsive and attractive semaphorins cooperate to direct the navigation of cardiac neural crest cells*. Developmental biology, 2008. **321**(1): p. 251-262.
- 42
- 43
- 44 17. Kim, N., et al., *Repulsive Sema3E-Plexin-D1 signaling coordinates both axonal extension and steering via activating an autoregulatory factor, Mtss1*. 2022: p. 2022.05.03.490499.
- 45
- 46
- 47 18. Gay, C.M., T. Zygmunt, and J. Torres-Vázquez, *Diverse functions for the semaphorin receptor PlexinD1 in development and disease*. Developmental biology, 2011. **349**(1): p. 1-19.
- 48
- 49

- 1 19. Dooley, C.M., et al., *On the embryonic origin of adult melanophores: the role of ErbB*  
2 *and Kit signalling in establishing melanophore stem cells in zebrafish*. *Development*,  
3 2013. **140**(5): p. 1003-13.
- 4 20. Peters, E.M., et al., *Profiling mRNA of the graying human hair follicle constitutes a*  
5 *promising state-of-the-art tool to assess its aging: an exemplary report*. *J Invest*  
6 *Dermatol*, 2013. **133**(5): p. 1150-60.
- 7 21. Torres-Vázquez, J., et al., *Semaphorin-plexin signaling guides patterning of the*  
8 *developing vasculature*. *Developmental cell*, 2004. **7**(1): p. 117-123.
- 9 22. Gitler, A.D., M.M. Lu, and J.A. Epstein, *PlexinD1 and semaphorin signaling are*  
10 *required in endothelial cells for cardiovascular development*. *Developmental cell*,  
11 2004. **7**(1): p. 107-116.
- 12 23. Ablain, J., et al., *Human tumor genomics and zebrafish modeling identify SPRED1 loss*  
13 *as a driver of mucosal melanoma*. *Science*, 2018. **362**(6418): p. 1055-1060.
- 14 24. Raja, D.A., et al., *pH-controlled histone acetylation amplifies melanocyte*  
15 *differentiation downstream of MITF*. *EMBO Rep*, 2020. **21**(1): p. e48333.
- 16 25. Natarajan, V.T., et al., *IFN-gamma signaling maintains skin pigmentation homeostasis*  
17 *through regulation of melanosome maturation*. *Proc Natl Acad Sci U S A*, 2014.  
18 **111**(6): p. 2301-6.
- 19 26. Oh, W.J. and C. Gu, *The role and mechanism-of-action of Sema3E and Plexin-D1 in*  
20 *vascular and neural development*. *Semin Cell Dev Biol*, 2013. **24**(3): p. 156-62.
- 21 27. Gay, C.M., T. Zygmunt, and J. Torres-Vazquez, *Diverse functions for the semaphorin*  
22 *receptor PlexinD1 in development and disease*. *Dev Biol*, 2011. **349**(1): p. 1-19.
- 23 28. Lin, B., et al., *Interplay between chemotaxis and contact inhibition of locomotion*  
24 *determines exploratory cell migration*. *Nat Commun*, 2015. **6**: p. 6619.
- 25 29. Chwieralski, C.E., et al., *Epidermal growth factor and trefoil factor family 2*  
26 *synergistically trigger chemotaxis on BEAS-2B cells via different signaling cascades*.  
27 *Am J Respir Cell Mol Biol*, 2004. **31**(5): p. 528-37.
- 28 30. Tester, A.M., et al., *LPS responsiveness and neutrophil chemotaxis in vivo require*  
29 *PMN MMP-8 activity*. *PLoS One*, 2007. **2**(3): p. e312.
- 30 31. Vanover, J.C., et al., *Stem cell factor rescues tyrosinase expression and pigmentation*  
31 *in discreet anatomic locations in albino mice*. *Pigment Cell Melanoma Res*, 2009.  
32 **22**(6): p. 827-38.
- 33 32. Yoshida, H., et al., *Neural and skin cell-specific expression pattern conferred by steel*  
34 *factor regulatory sequence in transgenic mice*. *Dev Dyn*, 1996. **207**(2): p. 222-32.
- 35 33. Chou, W.C., et al., *Direct migration of follicular melanocyte stem cells to the epidermis*  
36 *after wounding or UVB irradiation is dependent on Mc1r signaling*. *Nat Med*, 2013.  
37 **19**(7): p. 924-9.
- 38 34. Hultman, K.A., et al., *Gene Duplication of the zebrafish kit ligand and partitioning of*  
39 *melanocyte development functions to kit ligand a*. *PLoS Genet*, 2007. **3**(1): p. e17.
- 40 35. O'Reilly-Pol, T. and S.L. Johnson, *Kit signaling is involved in melanocyte stem cell fate*  
41 *decisions in zebrafish embryos*. *Development*, 2013. **140**(5): p. 996-1002.
- 42 36. Li, A., et al., *Rac1 drives melanoblast organization during mouse development by*  
43 *orchestrating pseudopod- driven motility and cell-cycle progression*. *Dev Cell*, 2011.  
44 **21**(4): p. 722-34.
- 45 37. Kardash, E., et al., *A role for Rho GTPases and cell-cell adhesion in single-cell motility*  
46 *in vivo*. *Nat Cell Biol*, 2010. **12**(1): p. 47-53; sup pp 1-11.
- 47 38. Tryon, R.C. and S.L. Johnson, *Clonal and lineage analysis of melanocyte stem cells*  
48 *and their progeny in the zebrafish*. *Methods Mol Biol*, 2012. **916**: p. 181-95.
- 49 39. Mort, R.L., I.J. Jackson, and E.E. Patton, *The melanocyte lineage in development and*  
50 *disease*. *Development*, 2015. **142**(7): p. 1387.

- 1 40. Casazza, A., et al., *Sema3E-Plexin D1 signaling drives human cancer cell invasiveness*  
2 *and metastatic spreading in mice*. J Clin Invest, 2010. **120**(8): p. 2684-98.
- 3 41. Miyamori, H., et al., *Expression of metastasis-associated mts1 gene is co-induced with*  
4 *membrane type-1 matrix metalloproteinase (MT1-MMP) during oncogenic*  
5 *transformation and tubular formation of Madin Darby canine kidney (MDCK)*  
6 *epithelial cells*. Clin Exp Metastasis, 2000. **18**(1): p. 51-6.
- 7 42. Dumitrescu, C.E. and M.T. Collins, *McCune-Albright syndrome*. Orphanet J Rare Dis,  
8 2008. **3**: p. 12.
- 9 43. Rudman, D., R.K. Chawla, and B.M. Hollins, *N,O-Diacetylserine1 alpha-melanocyte-*  
10 *stimulating hormone, a naturally occurring melanotropic peptide*. J Biol Chem, 1979.  
11 **254**(20): p. 10102-8.
- 12 44. Garcia-Borron, J.C., B.L. Sanchez-Laorden, and C. Jimenez-Cervantes, *Melanocortin-*  
13 *1 receptor structure and functional regulation*. Pigment Cell Res, 2005. **18**(6): p. 393-  
14 410.
- 15 45. Hultman, K.A., et al., *Defects in ErbB-dependent establishment of adult melanocyte*  
16 *stem cells reveal independent origins for embryonic and regeneration melanocytes*.  
17 PLoS Genet, 2009. **5**(7): p. e1000544.
- 18 46. Lamont, R.E., E.J. Lamont, and S.J. Childs, *Antagonistic interactions among Plexins*  
19 *regulate the timing of intersegmental vessel formation*. Dev Biol, 2009. **331**(2): p. 199-  
20 209.
- 21 47. Callander, D.C., et al., *Expression of multiple class three semaphorins in the retina and*  
22 *along the path of zebrafish retinal axons*. Dev Dyn, 2007. **236**(10): p. 2918-24.
- 23 48. Yamanaka, H. and S. Kondo, *In vitro analysis suggests that difference in cell movement*  
24 *during direct interaction can generate various pigment patterns in vivo*. Proc Natl Acad  
25 Sci U S A, 2014. **111**(5): p. 1867-72.
- 26

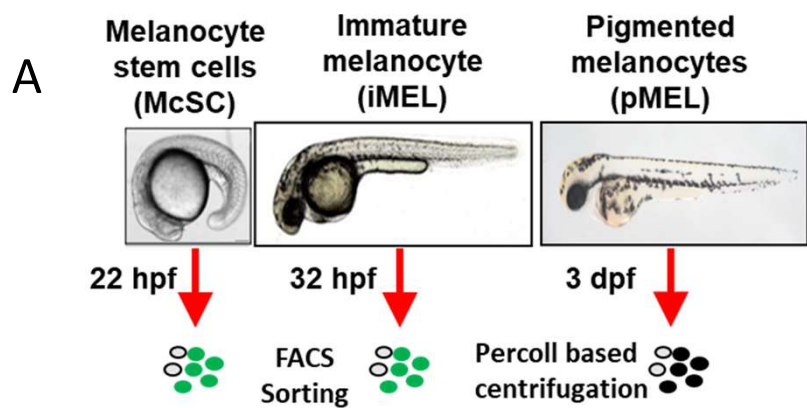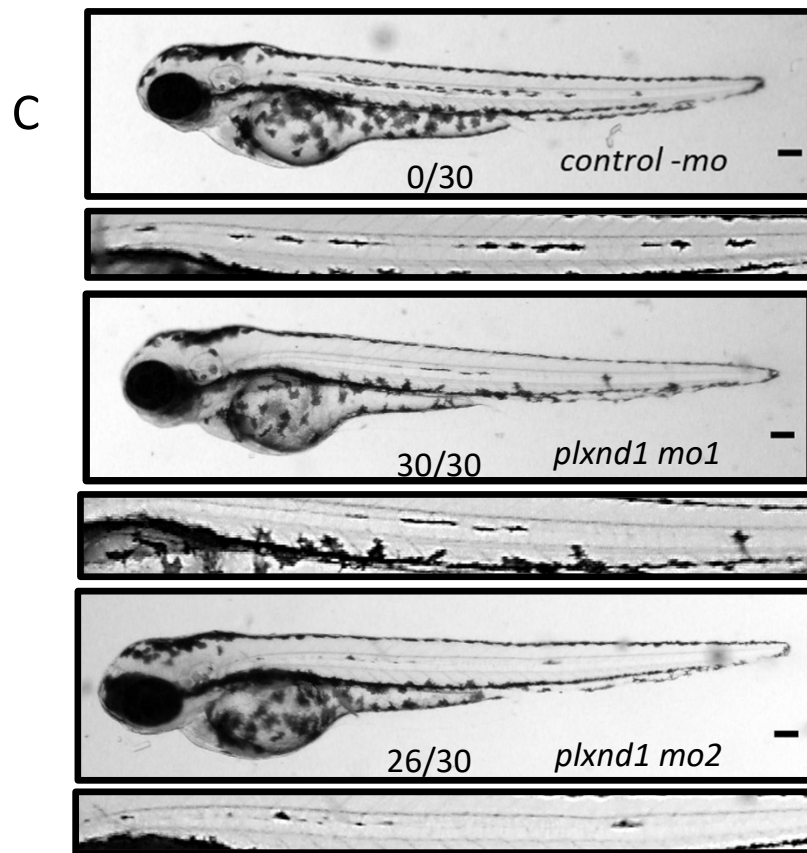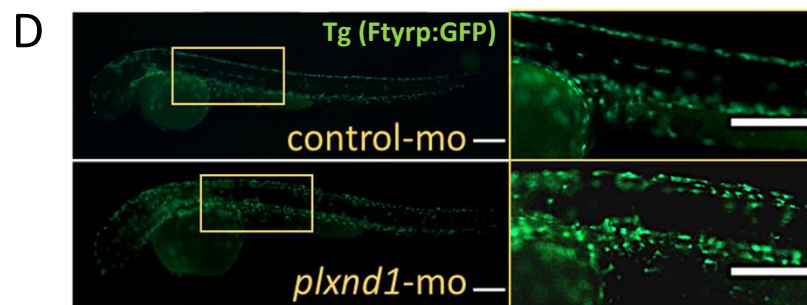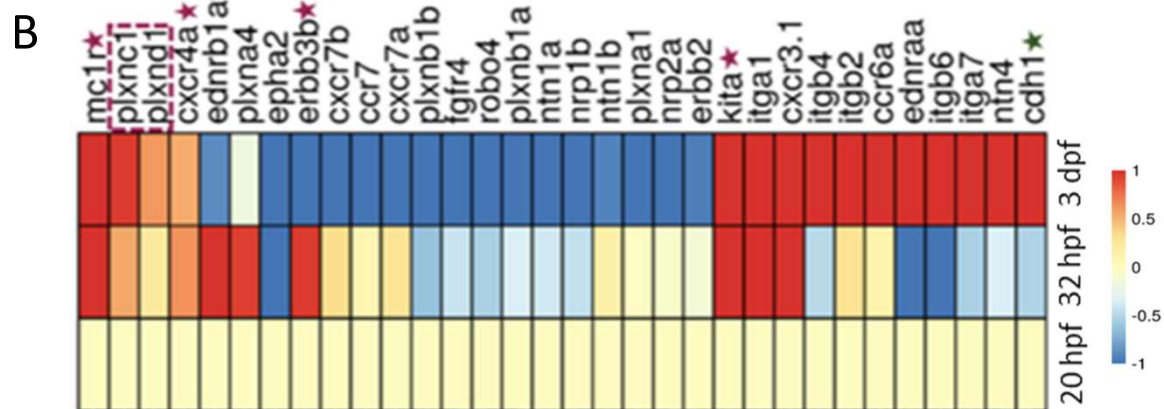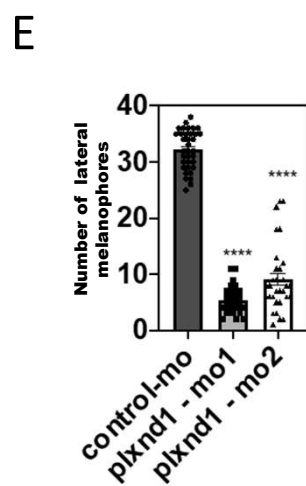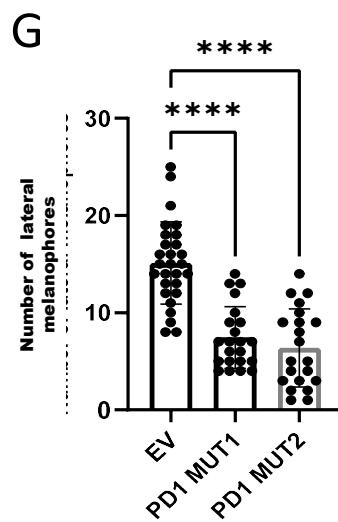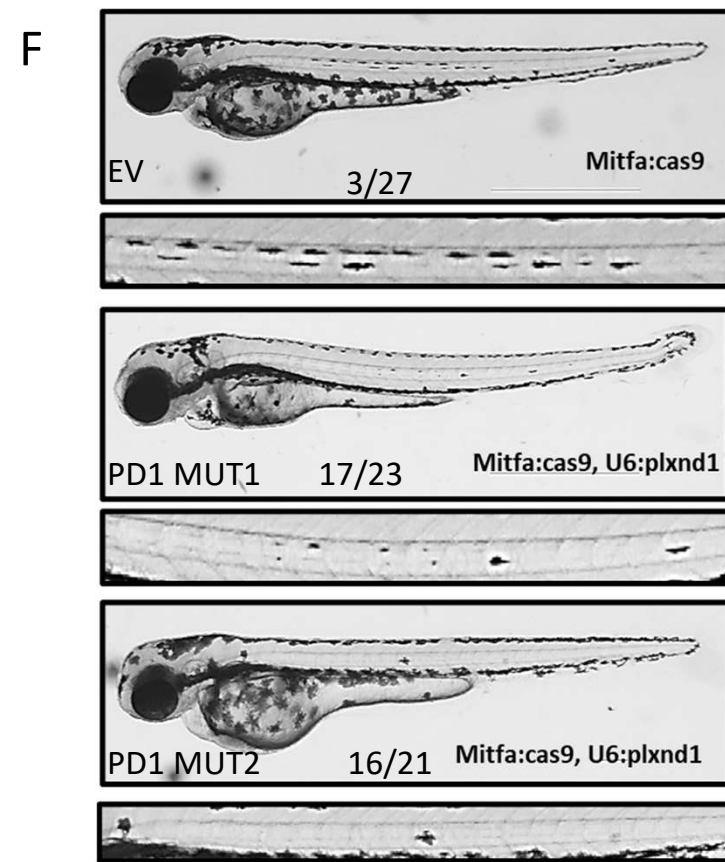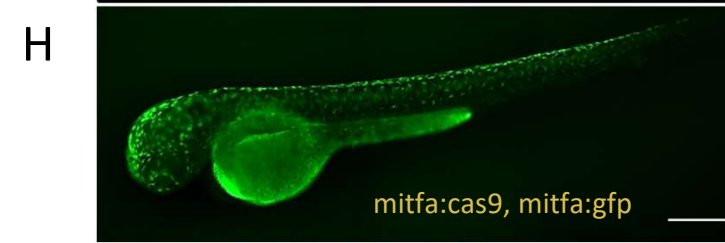

Fig 1



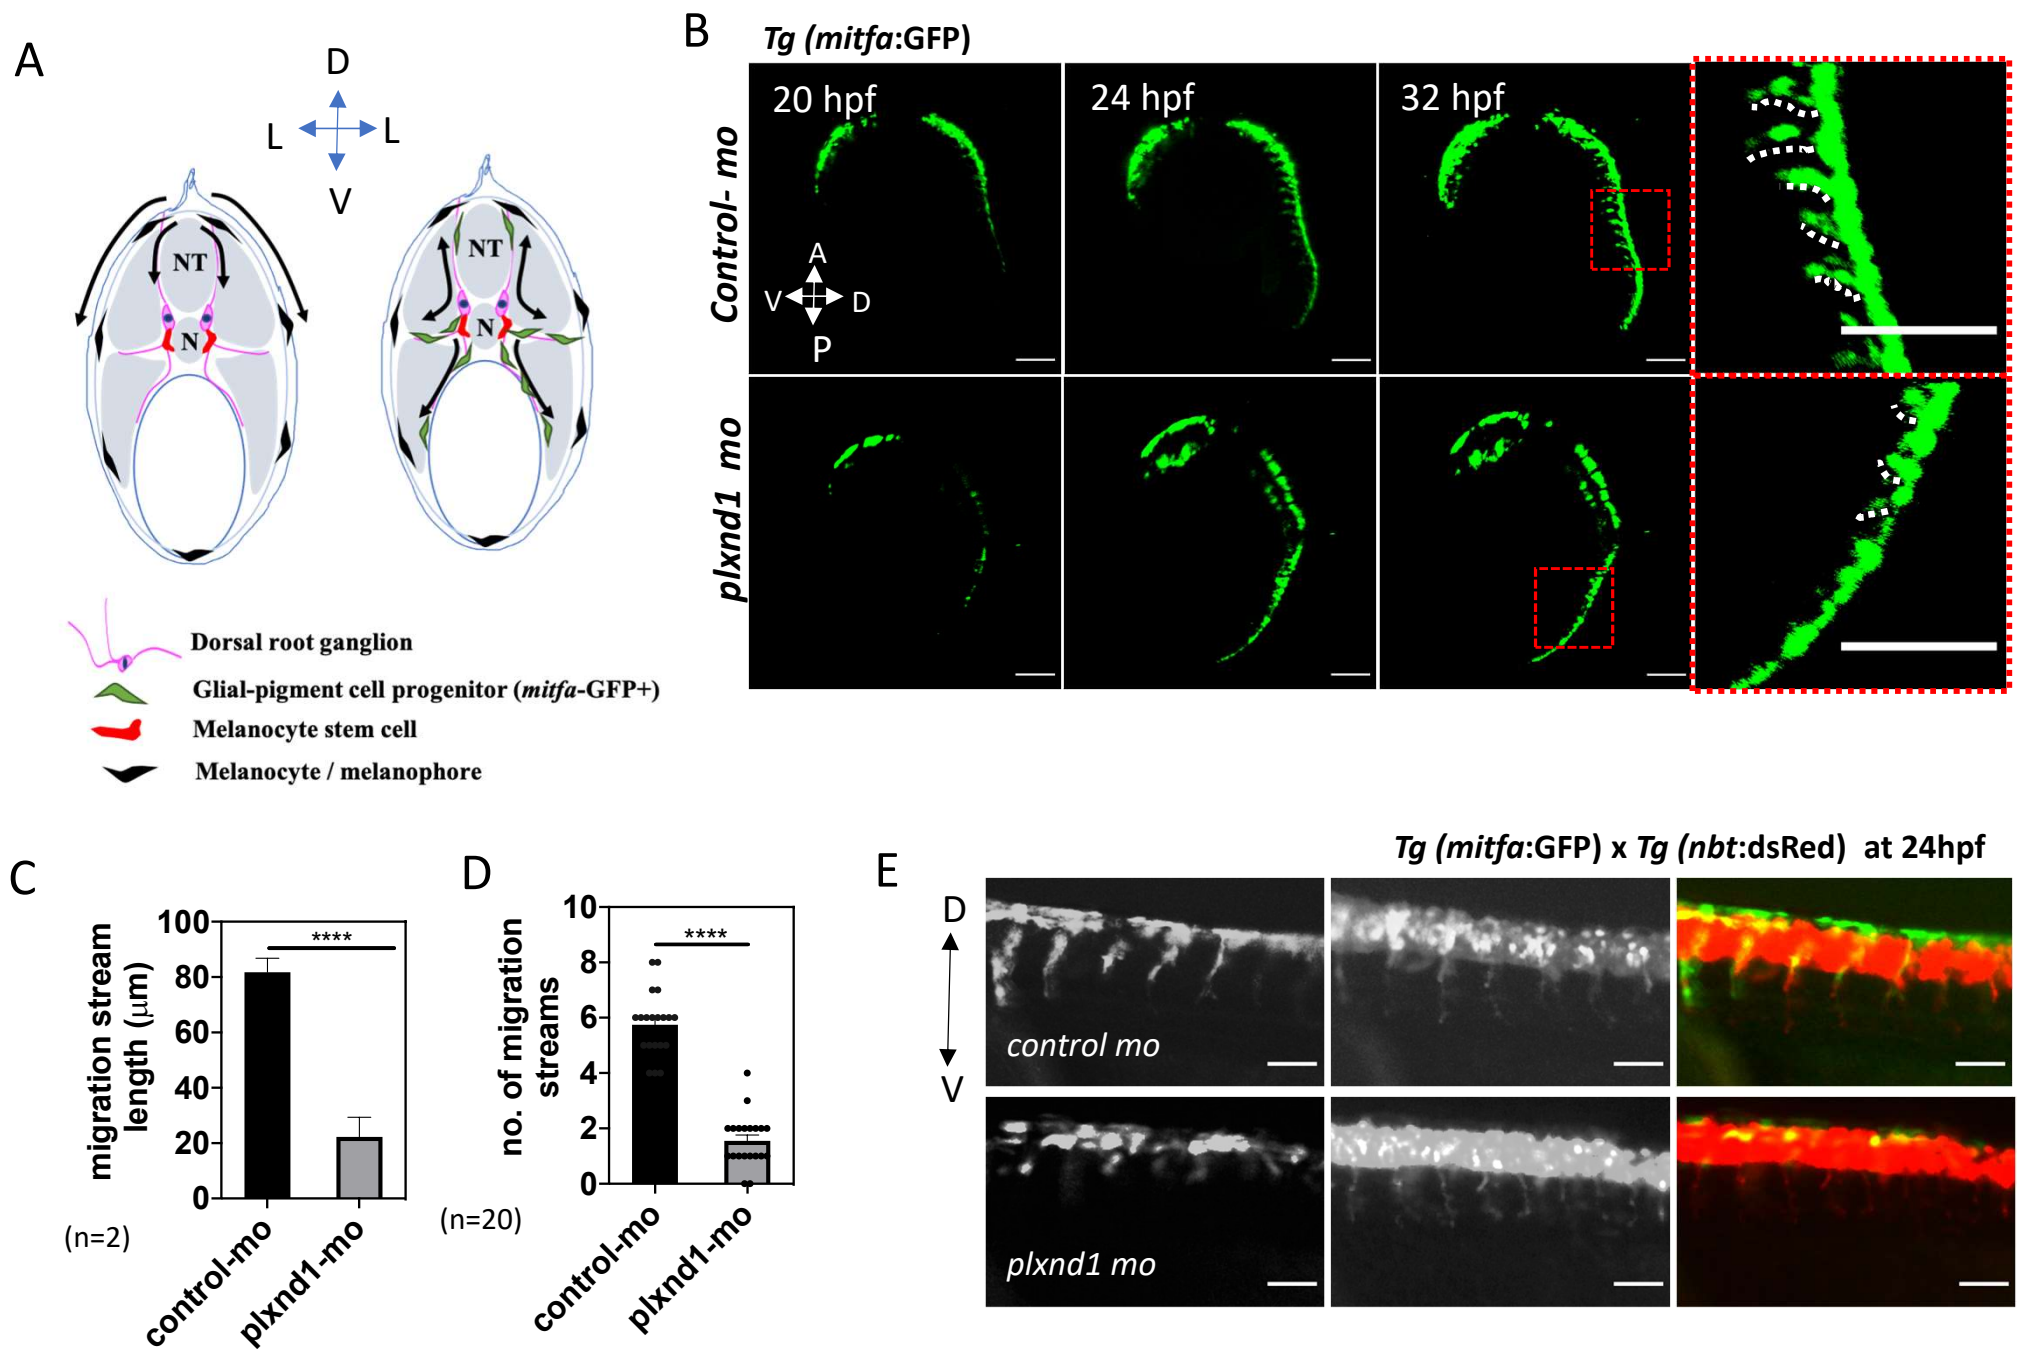

Fig 2

**A** DAPI/Phalloidin

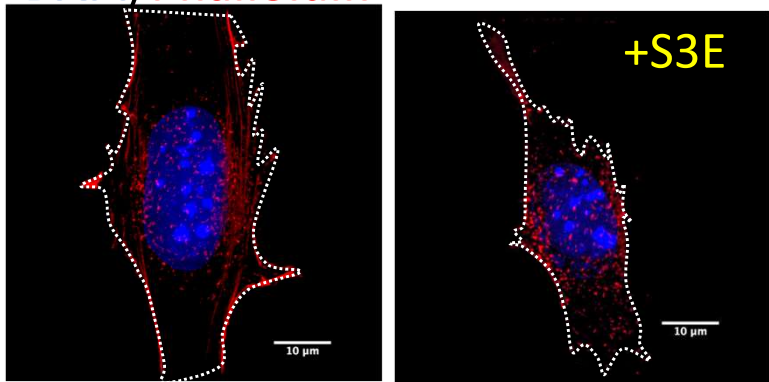

**B** **C**

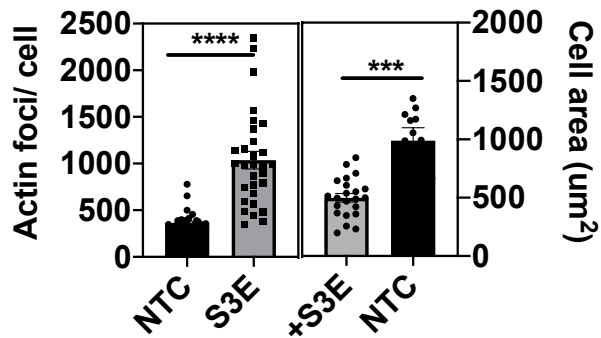

**D** DAPI/Phalloidin

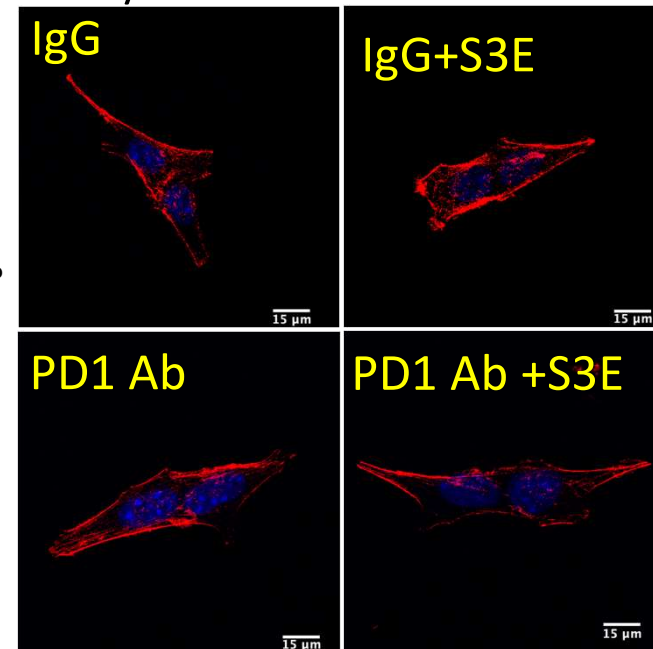

**E** ShNT (+S3E)

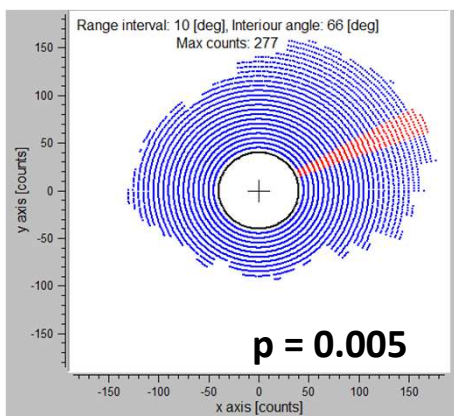

ShPD(+S3E)

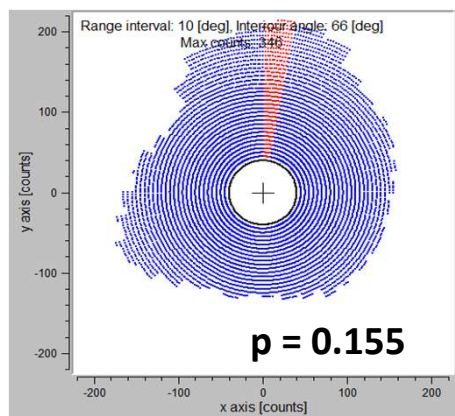

**H** ShNT (+SCF)

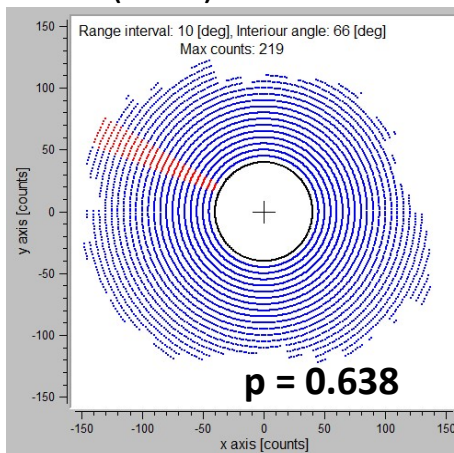

ShNT (SCF +S3E)

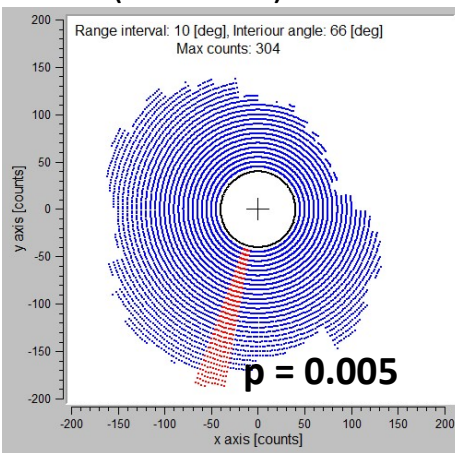

**F** ShNT ShPD

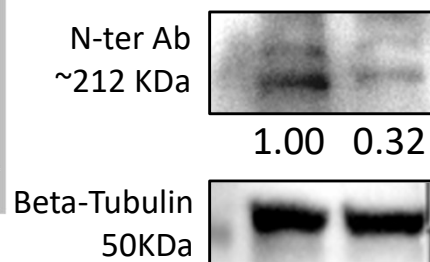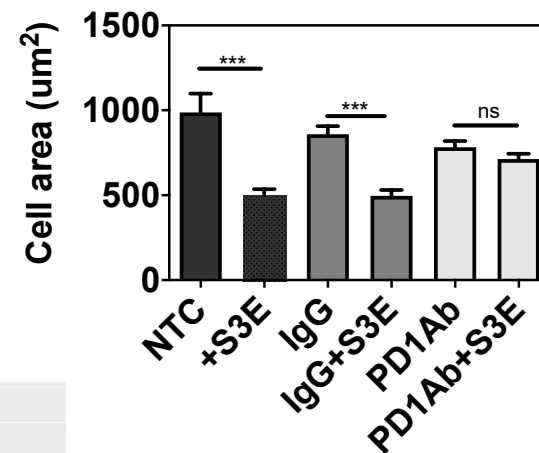

**G**

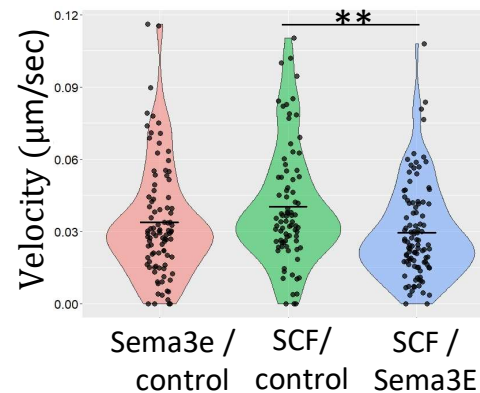

Fig 3

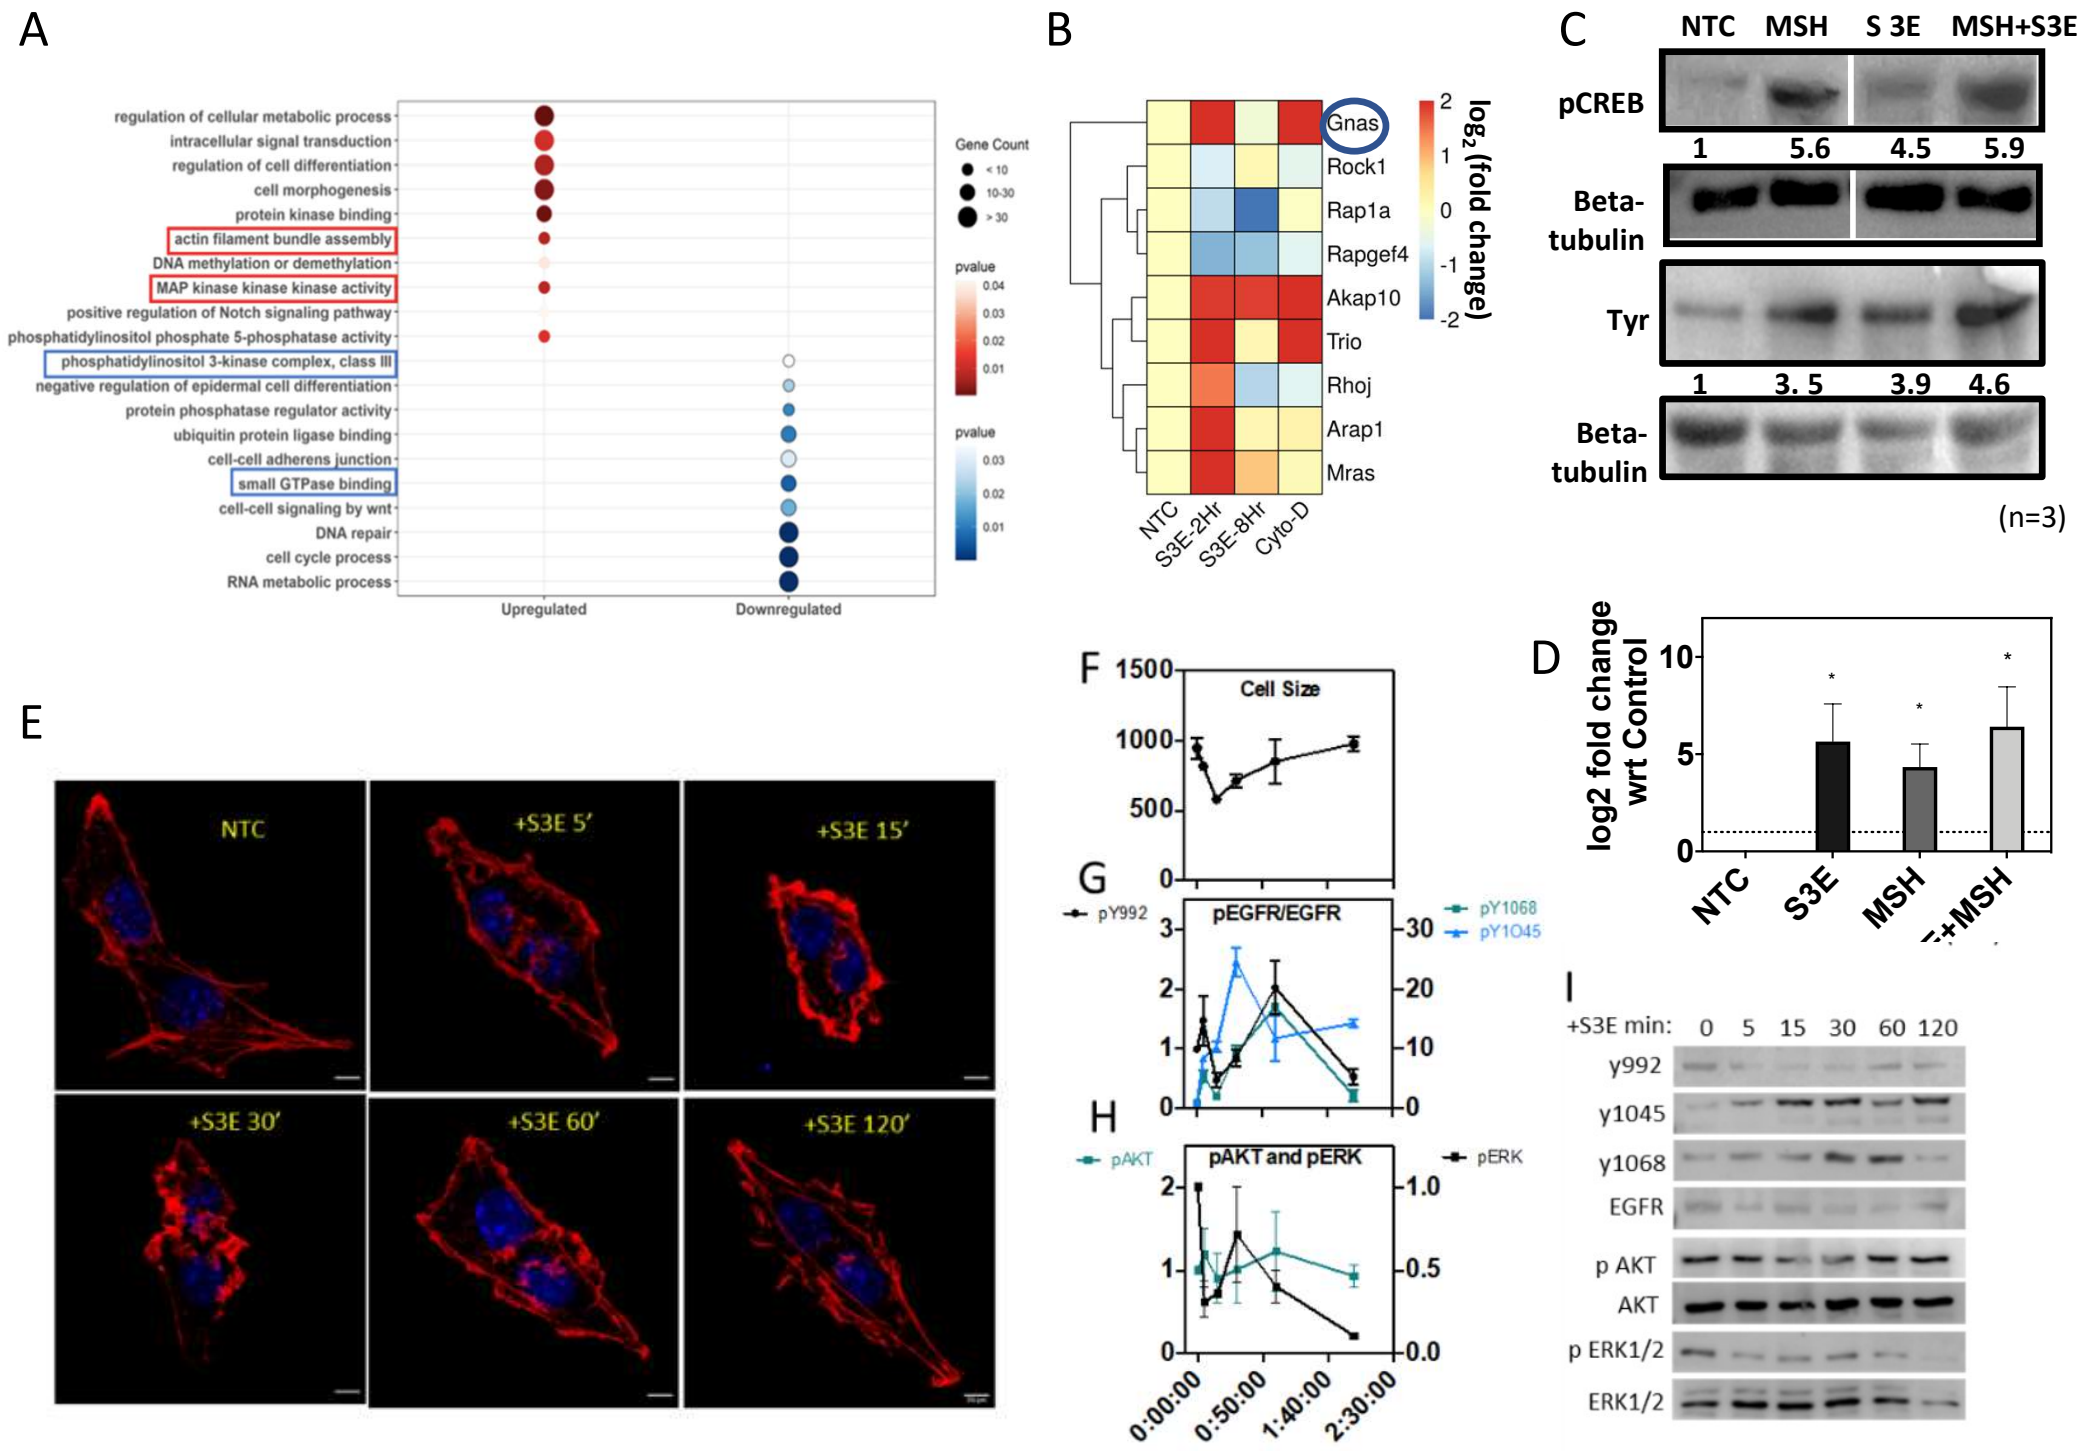

Fig 4

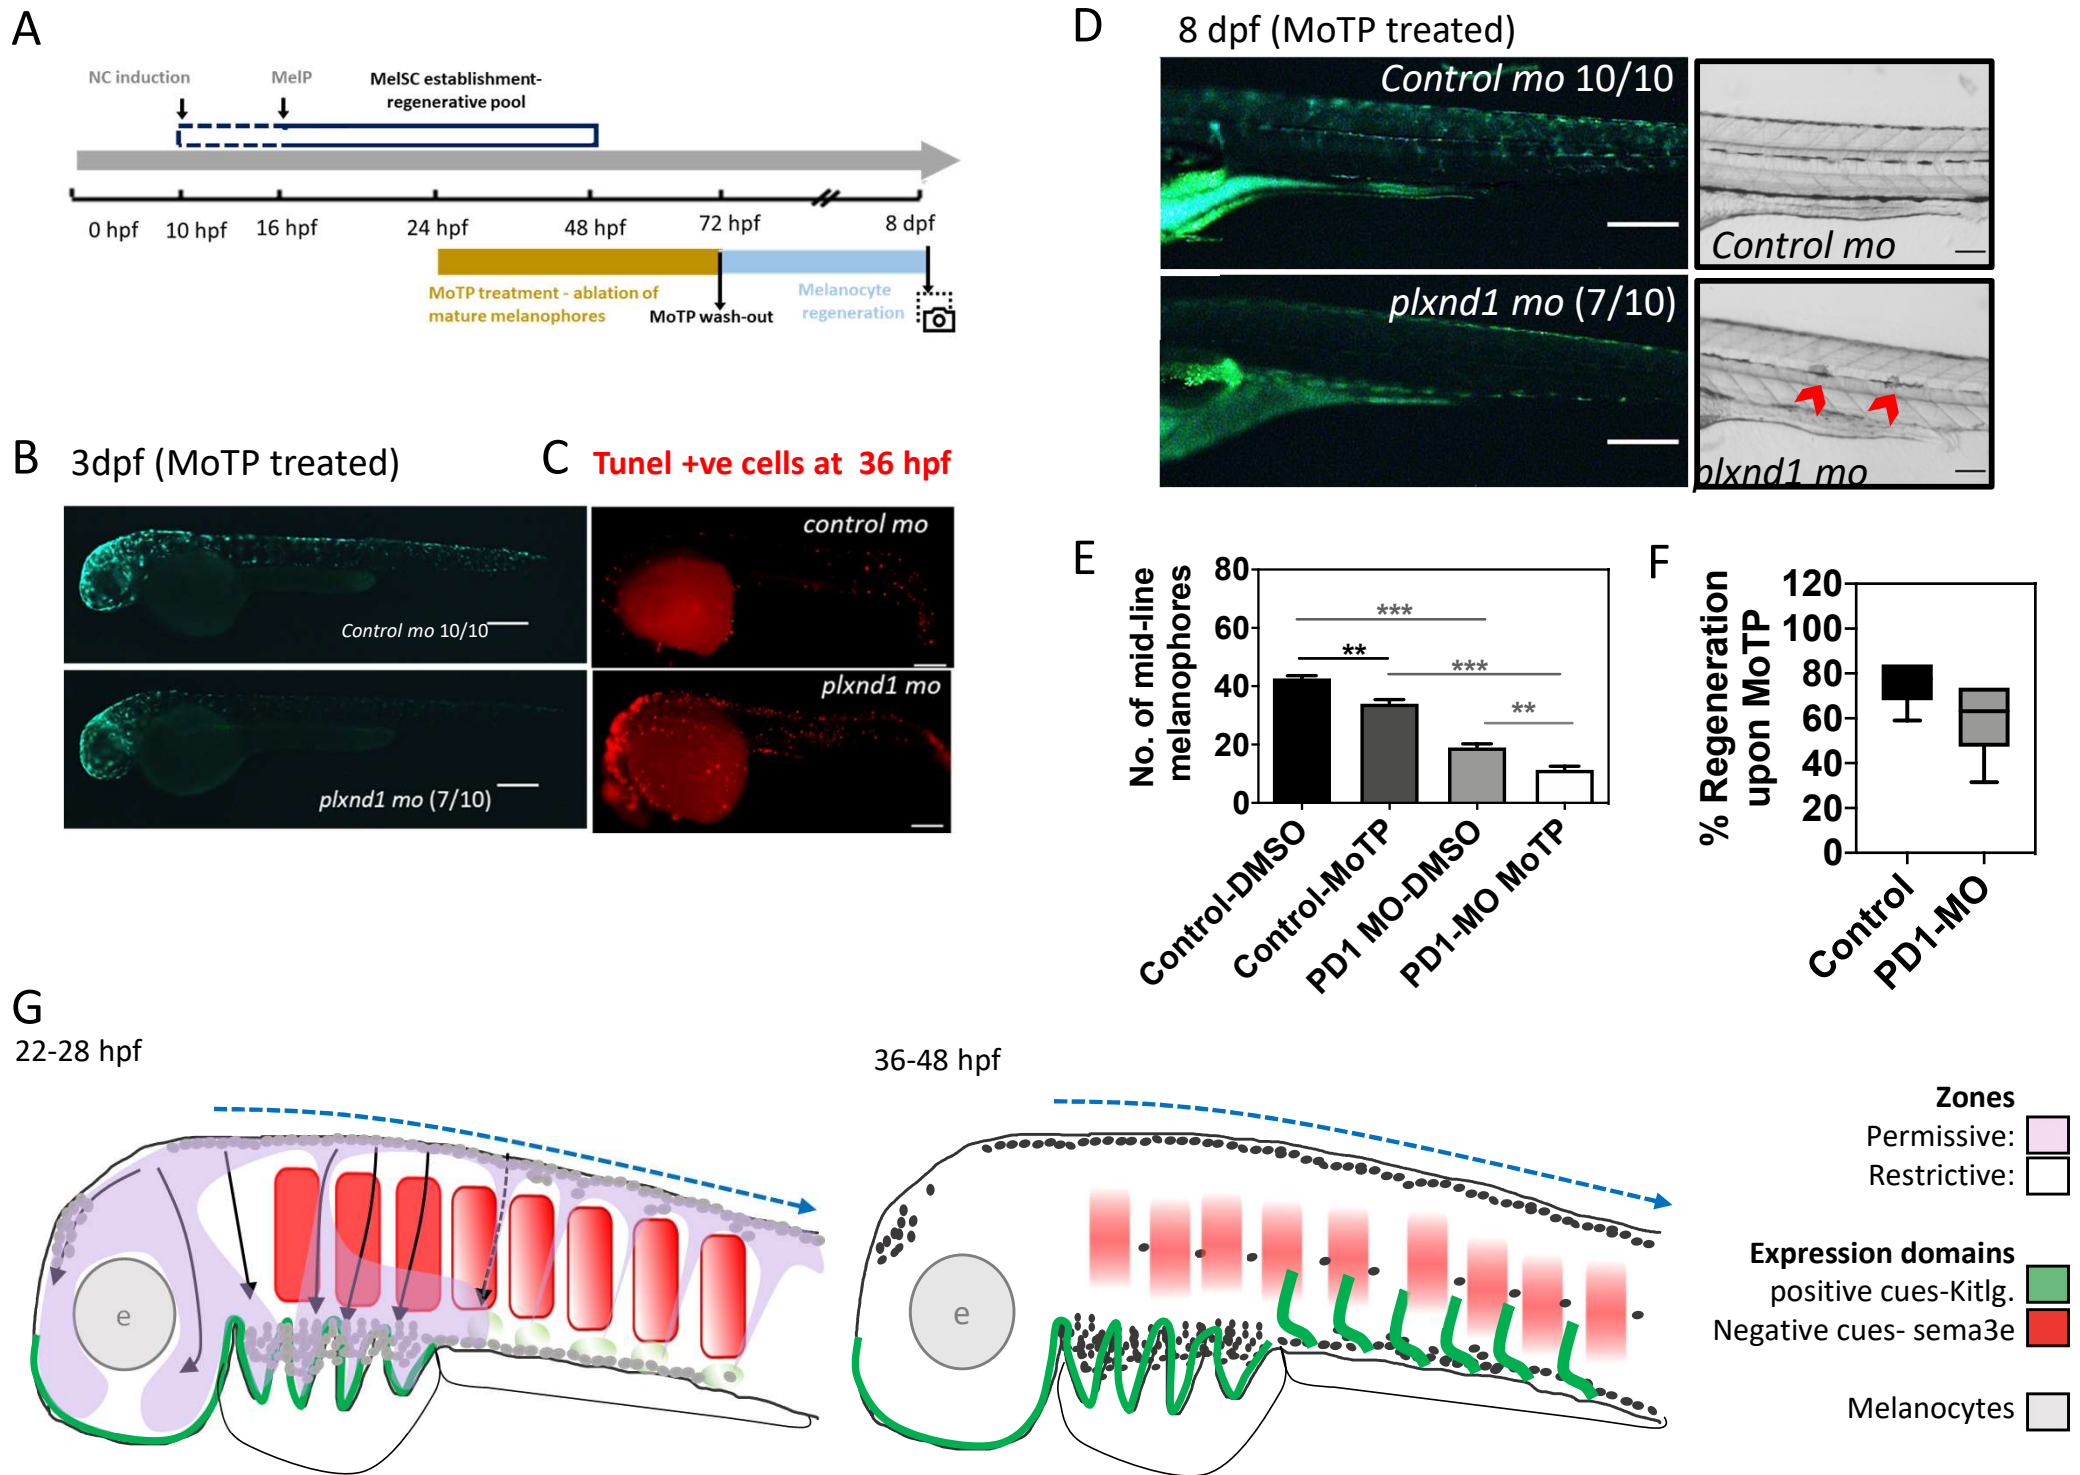

Fig 5
